# Supplementary material for: Characterization of Lactate Metabolism Score in Breast and Thyroid Cancers to Assist Immunotherapy via Large-Scale Transcriptomic Data Analysis
Source: Front Pharmacol. 2022 Jul 7;13:928419. doi: 10.3389/fphar.2022.928419 (PMC9301074; doi:10.3389/fphar.2022.928419)
Supplement: Supplementary file 1 [file Table2.XLSX]

## Sheet: Table S1
Supplementary Table 1: List of TCGA cancer types.
Project (Abbreviations)	Cancer Type	Data type of expression	Tumor	Normal	P-value(Mann-Whitney U)	FDR
ACC	Adrenocortical carcinoma	RNA-seq	229	3	0.0373124	0.0559686
BLCA	Bladder Urothelial Carcinoma	RNA-seq	382	19	0.0146765	0.0234825
BRCA	Breast invasive carcinoma	RNA-seq	1091	113	0.108848	0.14513
CESC	Cervical Squamous Cell Carcinoma and Endocervical Adenocarcinoma	RNA-seq	306	3	0.289844	0.316193
COAD	Colon adenocarcinoma	RNA-seq	422	42	1.83142e-09	7.32569e-09
ESCA	Esophageal Carcinoma	RNA-seq	149	11	0.00849437	0.0145618
GBM	Glioblastoma Multiforme	RNA-seq	150	5	0.000308772	0.000823391
HNSC	Head and Neck Squamous Cell Carcinoma	RNA-seq	470	44	1.04385e-08	3.57891e-08
KICH	Kidney Chromophobe	RNA-seq	65	24	0.802885	0.837793
KIRC	Kidney Renal Clear Cell Carcinoma	RNA-seq	479	72	2.72246e-36	6.53391e-35
KIRP	Kidney Renal Papillary Cell Carcinoma	RNA-seq	272	32	4.37877e-10	2.10181e-09
LIHC	Hepatocellular Carcinoma	RNA-seq	357	50	3.4728e-11	2.08368e-10
LUAD	Lung Adenocarcinoma	RNA-seq	472	59	5.77876e-19	4.62301e-18
LUSC	Lung Squamous Cell Carcinoma	RNA-seq	475	50	5.16469e-23	6.19763e-22
PAAD	Pancreatic Adenocarcinoma	RNA-seq	149	4	0.00331819	0.0072397
PCPG	Pheochromocytoma and Paraganglioma	RNA-seq	174	3	0.00847375	0.0156438
PRAD	Prostate Adenocarcinoma	RNA-seq	499	52	0.933842	0.933842
READ	Rectum adenocarcinoma	RNA-seq	154	10	0.00215824	0.00517977
SARC	Sarcoma	RNA-seq	263	2	0.119745	0.151257
SKCM	Skin Cutaneous Melanoma	RNA-seq	372	1	--	--
STAD	Stomach Adenocarcinoma	RNA-seq	375	32	0.1722	0.1968
THCA	Thyroid Carcinoma	RNA-seq	510	58	0.1253	0.15036
THYM	Thymoma	RNA-seq	119	2	0.0839901	0.118574
UCEC	Uterine Corpus Endometrial Carcinoma	RNA-seq	512	35	0.00419143	0.00838286

## Sheet: Table S2
Supplementary Table 2: List of the gene sets.
HLA: human leukocyte antigen; CD8: CD8+T cells; IFN: interferon response; TILs: tumor-infiltrating lymphocytes; CYT: immune cytolytic activity
Immune signatures					NLRP3-inflammasome-related gene set		Checkpoint genes
HLA	IFN	TILs	CYT		ARRDC1-AS1		IDO1
HLA-E	JAK2	ITM2C	PRF1		CARD8		LAG3
HLA-DPB2	IRF1	CD38	GZMA		GSDMD		CTLA4
HLA-C	IRF2	THEMIS2			ATAT1		TNFRSF9
HLA-J	GBP4	GLYR1			CD36		ICOS
HLA-DQB1	GBP5	ICOS			CPTP		CD80
HLA-DQB2		F5			DHX33		PDCD1LG2
HLA-DQA2		TIGIT			EIF2AK2		TIGIT
HLA-DQA1		KLRD1			GBP5		CD70
HLA-A		IRF4			NLRC3		TNFSF9
HLA-DMA		PRKCQ			PYDC2		ICOSLG
HLA-DOB		FCRL5			SIRT2		KIR3DL1
HLA-DRB1		SIRPG			TLR4		CD86
HLA-B		LPXN			TLR6		PDCD1
HLA-DRB5		IL2RG			USP50		LAIR1
HLA-DOA		CCL5			APP		TNFRSF8
HLA-DPB1		LCK			CASP1		TNFSF15
HLA-DRA		TRAF3IP3			HSP90AB1		TNFRSF14
HLA-DRB6		CD86			MEFV		IDO2
HLA-F		MAL			NFKB1		CD276
HLA-G		LILRB1			NFKB2		CD40
HLA-DMB		DOK2			NLRP3		TNFRSF4
HLA-DPA1		CD6			P2RX7		TNFSF14
		PAG1			PANX1		HHLA2
		LAX1			PSTPIP1		CD244
		PLEK			PYCARD		CD274
		PIK3CD			RELA		HAVCR2
		SLAMF1			SUGT1		CD27
		XCL1			TXN		BTLA
		GPR171			TXNIP		LGALS9
		XCL2					TMIGD2
		TBX21					CD28
		CD2					CD48
		CD53					TNFRSF25
		KLHL6					CD40LG
		SLAMF6					ADORA2A
		CD40					VTCN1
		SIT1					CD160
		TNFRSF4					CD44
		CD79A					TNFSF18
		CD247					TNFRSF18
		LCP2					BTNL2
		CD3D					C10orf54
		CD27					CD200R1
		SH2D1A					TNFSF4
		FYB					CD200
		ARHGAP30					NRP1
		ACAP1
		CST7
		CD3G
		IL2RB
		CD3E
		FCRL3
		CORO1A
		ITK
		TCL1A
		CYBB
		CSF2RB
		IKZF1
		NCF4
		DOCK2
		CCR2
		PTPRC
		PLAC8
		NCKAP1L
		IL7R
		2019-09-06
		CD28
		STAT4
		CD8A
		LY9
		CD48
		HCST
		PTPRCAP
		SASH3
		ARHGAP25
		LAT
		TRAT1
		IL10RA
		PAX5
		CCR7
		DOCK11
		PARVG
		SPNS1
		CD52
		HCLS1
		ARHGAP9
		GIMAP6
		PRKCB
		MS4A1
		GPR18
		TBC1D10C
		GVINP1
		P2RY8
		EVI2B
		VAMP5
		KLRK1
		SELL
		MPEG1
		MS4A6A
		ARHGAP15
		MFNG
		GZMK
		SELPLG
		TARP
		GIMAP7
		FAM65B
		INPP5D
		ITGA4
		MZB1
		GPSM3
		STK10
		CLEC2D
		IL16
		NLRC3
		GIMAP5
		GIMAP4
		IFFO1
		CFH
		PVRIG
		CFHR1

## Sheet: Table S3
Supplementary Table 3: List of datasets.
Datasets types	Accession	Title	Cancer Type	Project (Abbreviations)	Data type of expression	Available Cases per Data Category Used in Study
						Tumor	Normal	P-value (Mann-Whitney U,NLRP3 inflammasome score)	FDR (NLRP3 inflammasome score)
Testing datasets	GSE15605	Transcriptome profiling identifies HMGA2 as a novel gene in melanoma progression	Skin Cutaneous Melanoma	SKCM	microarray data	58	16	1.10825e-06	3.32476e-06
Validation datasets	GSE13507	Predective Value of Prognosis-Related Gene Expression Study in Primary Bladder Cancer	Bladder Cancer	BLCA	microarray data	188	67	1.65208e-16	2.47812e-15
	GSE41258	Expression data from colorectal cancer patients	Colon adenocarcinoma	COAD	microarray data	148	45	0.00195936	0.00367381
	GSE26886	Gene expression profiling of Barrett's esophagus, adenocarcinoma, esophageal squamous epithelium and squamous cell carcinoma	Esophageal Carcinoma	ESCA	microarray data	30	19	0.00181482	0.0038889
	GSE90604-GPL17692	Expression data from Glioblastoma Multiforme patient tumor samples, healthy brain tissue (partly from GBM patients) and NHA cell line and Human fetal astrocyte cell line	Glioblastoma Multiforme	GBM	microarray data	16	9	0.0165474	0.0206843
	GSE31056	A gene signature in histologically normal surgical margins is predictive of oral carcinoma recurrence	Oral Carcinoma	HNSC	microarray data	21	23	0.0248353	0.0286561
	GSE36895	Molecular Genetic Classification of clear-cell Renal Cell Carcinoma (ccRCC) based on the Gene Expression Profiling of Tumors and Tumorgrafts deficient for BAP1 or PBRM1	Kidney Renal Clear Cell Carcinoma	KIRC	microarray data	29	23	1.13466e-09	5.67332e-09
	GSE11151	Gene expression data from different types of renal tumors and normal kidneys	Kidney Renal Papillary Cell Carcinoma	KIRP	microarray data	19	5	9.41088e-05	0.000235272
	GSE101728	Expression profiling of lncRNA and mRNA in Hepatocellular carcinoma	Hepatocellular Carcinoma	LIHC	microarray data	7	7	0.00407925	0.00679876
	GSE10072	Gene expression signature of cigarette smoking and its role in lung adenocarcinoma development and survival	Lung Adenocarcinoma	LUAD	microarray data	58	49	3.57628e-12	2.68221e-11
	GSE30219	"Off-context" gene expression in lung cancer identifies a group of metastatic-prone tumors	Lung Squamous Cell Carcinoma	LUSC	microarray data	61	14	1.73306e-05	5.19918e-05
	GSE71729	Virtual Microdissection of Pancreatic Ductal Adenocarcinoma Reveals Tumor and Stroma Subtypes.	Pancreatic Adenocarcinoma	PAAD	microarray data	145	46	0.856678	0.856678
	GSE19422	Gene expression profiling of pheochromocytoma (PCC)/paraganglioma (PGL) tumors	Pheochromocytoma and Paraganglioma	PCPG	microarray data	84	6	0.00690712	0.0103607
	GSE87211	Colorectal cancer susceptibility loci as predictive markers of rectal cancer prognosis after surgery	Rectum adenocarcinoma	READ	microarray data	203	160	9.43015e-06	3.53631e-05
	GSE46517	Human melanoma samples comparing nevi and primary and metastatic melanoma	Skin Cutaneous Melanoma	SKCM	microarray data	104	8	0.013782	0.0187936
	GSE63678	Expression data from Vulvar, Cervical, Endometrial Carcinoma tissue	Uterine Corpus Endometrial Carcinoma	UCEC	microarray data	7	5	0.030303	0.0324675
Validation datasets for OS of SKCM	GSE65904	Whole-genome expression analysis of melanoma tumor biopsies from a population-based cohort.	Skin Cutaneous Melanoma	SKCM	microarray data	210	--	--
The immunotherapy response datasets	GSE111636	Identification of potential biomarkers of response and resistance to programmed cell death-1 blockade in patients with advanced urothelial tumors	Bladder Cancer	BLCA	microarray data	11	--	--
	GSE19423	Predictive Gene Signatures as Strong Prognostic Indicators of the Effectiveness of BCG Immunotherapy	Bladder Cancer	BLCA	microarray data	48	--	--
	GSE67501	Expression data in human renal cell carcinoma samples from patients who did or did not respond to anti-PD-1 (Nivolumab) immunotherapy	Renal Cell Carcinoma	RCC	microarray data	11	--	--
	GSE26383	Response to immunotherapy in melanoma metastasis	Skin Cutaneous Melanoma	SKCM	microarray data	15	--	--
	GSE79691	Transcriptional mechanisms of resistance to anti-PD-1 therapy	Skin Cutaneous Melanoma	SKCM	microarray data	9	--	--
	Miao D, et al.	Genomic correlates of response to immune checkpoint therapies in clear cell renal cell carcinoma	Kidney Renal Clear Cell Carcinoma	KIRC	microarray data	33	--	--

## Sheet: Table S4
Supplementary Table 4: List of NLRP3-inflammasome-related genes' alterations in 15 cancer types.
	Four ranges of alteration rate							Alteration types								Average alteration rate
	<1%	1-3%	3-5%	>5%	Total			Mutation	Fusion	Amplification	Deep Deletion	Multiple Alteration	No Alteration		ARRDC1-AS1	0.01
BLCA	2	14	9	5	30		BLCA	0.1552	0.0049	0.202	0.069	0.0936	0.4753		CARD8	0.0118571
COAD+READ	4	20	5	1	30		COAD+READ	0.2091	0.0019	0.0664	0.0342	0.019	0.6694		GSDMD	0.0533571
ESCA	3	14	10	3	30		ESCA	0.0934	0	0.3736	0.0495	0.0824	0.4011		ATAT1	0.0171429
GBM	15	14	1	0	30		GBM	0.0926	0.0026	0.0899	0.0212	0.0026	0.7911		CD36	0.0214286
HNSC	8	14	5	3	30		HNSC	0.129	0.002	0.2419	0.0423	0.0605	0.5243		CPTP	0.0175
KIRC	27	3	0	0	30		KIRC	0.0876	0.0028	0.0254	0.0169	0.0028	0.8645		DHX33	0.0172143
KIRP	22	8	0	0	30		KIRP	0.0912	0.0036	0.0365	0.0255	0.0073	0.8359		EIF2AK2	0.0137143
LIHC	10	15	2	3	30		LIHC	0.1143	0.0029	0.22	0.0543	0.0457	0.5628		GBP5	0.0207857
LUAD	2	17	7	4	30		LUAD	0.2288	0.002	0.146	0.0355	0.1302	0.4575		NLRC3	0.026
LUSC	6	13	5	6	30		LUSC	0.1471	0	0.2388	0.0213	0.2111	0.3817		PYDC2	0.0587857
PAAD	13	13	1	3	30		PAAD	0.0629	0	0.24	0.04	0.0171	0.64		SIRT2	0.0277857
PCPG	21	8	0	1	30		PCPG	0.0185	0	0.111	0.037	0	0.8335		TLR4	0.0429286
SKCM	3	6	9	12	30		SKCM	0.3774	0	0.0992	0.022	0.1818	0.3196		TLR6	0.0202857
UCEC	1	3	6	20	30		UCEC	0.2908	0	0.1749	0.0373	0.0236	0.4734		USP50	0.0115714
															APP	0.0259286
															CASP1	0.0253571
															HSP90AB1	0.0381429
															MEFV	0.0307857
															NFKB1	0.0180714
															NFKB2	0.0173571
															NLRP3	0.0681429
															P2RX7	0.00985714
															PANX1	0.0182143
															PSTPIP1	0.0140714
															PYCARD	0.00807143
															RELA	0.0235
															SUGT1	0.0168571
															TXN	0.00535714
															TXNIP	0.0557143

## Sheet: Table S5
Supplementary Table 5: List of differentially methylated CpGs located in the promoter regions of NLRP3 inflammasome-related genes in diverse cancers.
Cancer type	Gene	CPGs	NormalMean	TumorMean	logFC	pValue	FDR	β value difference		Cancer type	Numbers of genes
BLCA	CARD8	cg19477346	0.616864	0.345449	-0.836478	1.48577e-09	1.402e-08	-0.271414		BLCA	9
BLCA	CARD8	cg05017628	0.686394	0.898628	0.388687	2.88704e-05	7.4498e-05	0.212234		COAD	7
BLCA	CARD8	cg26683005	0.459688	0.676585	0.557615	8.35574e-08	2.98006e-07	0.216897		ESCA	6
BLCA	CD36	cg05869611	0.691861	0.370676	-0.900322	4.78404e-10	5.71885e-09	-0.321185		GBM	0
BLCA	EIF2AK2	cg11344073	0.9072	0.683648	-0.408168	5.31502e-05	0.000120072	-0.223552		HNSC	8
BLCA	EIF2AK2	cg06477164	0.750454	0.535493	-0.486897	1.32952e-05	4.91279e-05	-0.214961		KIRC	12
BLCA	NLRC3	cg02819734	0.793014	0.452812	-0.808433	2.34749e-11	7.90572e-10	-0.340202		KIRP	9
BLCA	APP	cg11321156	0.553506	0.758368	0.454299	4.59217e-09	4.08653e-08	0.204862		LIHC	7
BLCA	APP	cg23269692	0.554269	0.801584	0.532268	7.62251e-09	5.2457e-08	0.247315		LUAD	4
BLCA	APP	cg24168308	0.477426	0.751452	0.654404	1.08866e-09	1.91456e-08	0.274026		LUSC	9
BLCA	MEFV	cg08260052	0.519459	0.780598	0.587571	1.89378e-09	2.00407e-08	0.26114		PAAD	4
BLCA	MEFV	cg26846864	0.620635	0.40907	-0.601397	3.47469e-10	2.6691e-09	-0.211565		PCPG	0
BLCA	NFKB1	cg23885005	0.518392	0.764992	0.561401	8.31461e-08	4.73127e-07	0.2466		SKCM	0
BLCA	NFKB1	cg25905215	0.540918	0.86401	0.675638	6.15389e-14	5.95491e-11	0.323092		READ	16
BLCA	NFKB1	cg04799232	0.458511	0.788306	0.7818	6.69478e-13	5.52228e-11	0.329795		UCEC	14
BLCA	NLRP3	cg03505654	0.44808	0.172438	-1.37767	1.96807e-07	8.84826e-07	-0.275641
BLCA	NLRP3	cg07164722	0.854718	0.636205	-0.425956	4.5958e-08	1.75565e-07	-0.218512
BLCA	NLRP3	cg12280471	0.626909	0.426796	-0.554709	3.56608e-06	1.01408e-05	-0.200113
BLCA	NLRP3	cg21806273	0.508782	0.264096	-0.945984	7.01389e-12	1.82576e-10	-0.244686
BLCA	NLRP3	cg07313373	0.412772	0.152165	-1.43971	9.32567e-11	1.56554e-09	-0.260607
BLCA	RELA	cg04466995	0.411332	0.670692	0.705347	1.52761e-10	2.83441e-09	0.25936
COAD	CARD8	cg17152266	0.897588	0.680429	-0.399609	2.09997e-14	1.63575e-13	-0.217159
COAD	CARD8	cg19477346	0.57714	0.30109	-0.938729	6.67829e-20	2.14942e-18	-0.276051
COAD	ATAT1	cg06182584	0.50824	0.710726	0.483783	1.36667e-13	9.02954e-13	0.202486
COAD	ATAT1	cg13011452	0.533455	0.783705	0.554943	4.0433e-21	8.07594e-19	0.25025
COAD	CD36	cg06601993	0.779826	0.53873	-0.53359	2.73502e-15	5.04514e-14	-0.241096
COAD	CD36	cg18433146	0.803508	0.549297	-0.548726	3.3838e-11	1.47278e-10	-0.254211
COAD	NLRC3	cg02819734	0.640101	0.437703	-0.548348	5.69534e-15	6.33226e-14	-0.202398
COAD	NLRC3	cg05428433	0.897194	0.683788	-0.391871	3.47696e-19	3.28983e-17	-0.213406
COAD	NLRP3	cg07313373	0.603526	0.372206	-0.697317	3.19635e-15	2.97251e-14	-0.231321
COAD	PSTPIP1	cg11829253	0.363538	0.619114	0.7681	2.41976e-17	7.92228e-16	0.255576
COAD	TXNIP	cg19693031	0.389971	0.695029	0.833706	3.71185e-18	1.63565e-16	0.305058
ESCA	CD36	cg06601993	0.710437	0.421297	-0.75387	1.34199e-06	0.000101683	-0.28914
ESCA	MEFV	cg08260052	0.502544	0.79146	0.655267	8.54152e-07	4.72156e-05	0.288916
ESCA	NLRP3	cg03505654	0.533217	0.329536	-0.694288	0.000456095	0.0029569	-0.203681
ESCA	P2RX7	cg22867729	0.812822	0.564545	-0.52585	1.2429e-05	0.000205269	-0.248277
ESCA	PYCARD	cg12100791	0.513326	0.302993	-0.760592	2.50961e-05	0.000263737	-0.210333
ESCA	PYCARD	cg09115984	0.470527	0.224404	-1.06818	6.40555e-06	0.000295439	-0.246123
ESCA	PYCARD	cg05214748	0.341253	0.125779	-1.43996	5.88809e-06	0.000283916	-0.215475
ESCA	PYCARD	cg08730348	0.30774	0.106116	-1.53607	2.82424e-05	0.000782632	-0.201624
ESCA	PYCARD	cg05907835	0.338427	0.109632	-1.62618	4.24729e-05	0.00104326	-0.228795
ESCA	PYCARD	cg15468095	0.284666	0.0828949	-1.77992	8.73826e-07	0.000375217	-0.201771
ESCA	TXNIP	cg19693031	0.482772	0.763709	0.661682	2.05341e-07	2.06441e-05	0.280938
HNSC	ATAT1	cg13011452	0.55913	0.770492	0.462597	1.03465e-23	2.10485e-22	0.211362
HNSC	ATAT1	cg19666256	0.443934	0.647267	0.544015	1.32278e-26	5.00805e-25	0.203333
HNSC	ATAT1	cg16583303	0.202403	0.452679	1.16126	4.6114e-17	2.67424e-16	0.250276
HNSC	GBP5	cg24400630	0.34874	0.588173	0.754091	6.60788e-24	9.50772e-23	0.239434
HNSC	TLR4	cg14605396	0.509178	0.279876	-0.863383	9.03818e-27	3.60868e-25	-0.229302
HNSC	TLR4	cg13730105	0.522525	0.263623	-0.987026	1.90443e-20	1.23021e-18	-0.258903
HNSC	TLR4	cg05429895	0.526233	0.143276	-1.87691	6.16785e-27	3.73071e-24	-0.382957
HNSC	TLR4	cg14629571	0.827331	0.604906	-0.451754	1.76775e-20	1.32133e-19	-0.222425
HNSC	MEFV	cg26846864	0.648056	0.404394	-0.680357	4.67245e-24	1.03764e-22	-0.243662
HNSC	MEFV	cg03919650	0.508732	0.306667	-0.730233	1.64756e-28	2.29684e-26	-0.202065
HNSC	MEFV	cg08260052	0.596077	0.803722	0.431198	1.38987e-20	1.40133e-19	0.207645
HNSC	NFKB1	cg25663524	0.65636	0.859735	0.389404	9.85287e-15	1.14906e-13	0.203374
HNSC	NLRP3	cg03505654	0.578101	0.245173	-1.23752	7.89619e-22	8.89904e-21	-0.332928
HNSC	NLRP3	cg07164722	0.884485	0.682583	-0.373835	5.94926e-22	1.50002e-20	-0.201903
HNSC	NLRP3	cg21919599	0.502586	0.234375	-1.10055	6.51433e-25	1.24156e-23	-0.268211
HNSC	NLRP3	cg07313373	0.549394	0.248199	-1.14634	9.9422e-27	4.70216e-25	-0.301195
HNSC	PSTPIP1	cg02371376	0.556535	0.221465	-1.3294	4.0069e-27	2.30935e-25	-0.33507
HNSC	PSTPIP1	cg21322248	0.424366	0.196746	-1.10898	4.48822e-25	1.27953e-23	-0.22762
HNSC	PSTPIP1	cg11829253	0.472237	0.684538	0.53562	2.7912e-24	4.53066e-23	0.212301
HNSC	PSTPIP1	cg16104837	0.500117	0.723862	0.533449	1.43257e-22	1.54831e-21	0.223745
HNSC	TXNIP	cg19693031	0.582565	0.851953	0.548356	6.12944e-28	1.93784e-25	0.269389
KIRC	GSDMD	cg06043315	0.342144	0.066325	-2.36698	8.15088e-69	2.29712e-66	-0.275819
KIRC	ATAT1	cg13011452	0.530103	0.761061	0.52174	1.98978e-65	4.04568e-63	0.230958
KIRC	EIF2AK2	cg14126601	0.392697	0.621122	0.661461	6.48838e-40	4.15689e-39	0.228425
KIRC	TLR4	cg05429895	0.252945	0.0500397	-2.33768	5.46743e-64	1.44799e-61	-0.202905
KIRC	TLR6	cg14578677	0.898336	0.658263	-0.448592	3.04289e-64	4.17695e-62	-0.240073
KIRC	TLR6	cg14665413	0.520775	0.117328	-2.15012	2.54943e-69	1.31515e-66	-0.403447
KIRC	APP	cg01286133	0.437606	0.745453	0.768485	3.09929e-57	1.11748e-55	0.307847
KIRC	APP	cg19788250	0.334935	0.596508	0.832659	5.40471e-48	7.80738e-47	0.261573
KIRC	APP	cg18597421	0.439333	0.646725	0.557837	5.80714e-48	6.10594e-47	0.207392
KIRC	CASP1	cg21002651	0.360057	0.0479589	-2.90835	1.97478e-67	8.41637e-65	-0.312098
KIRC	CASP1	cg13802966	0.456645	0.219174	-1.059	2.02584e-65	1.85596e-63	-0.237471
KIRC	MEFV	cg08260052	0.532583	0.745185	0.484592	1.50991e-43	1.15235e-42	0.212602
KIRC	MEFV	cg26846864	0.771817	0.476714	-0.695135	4.386e-62	2.75585e-60	-0.295103
KIRC	MEFV	cg00599219	0.64314	0.420918	-0.611593	2.10009e-42	1.54907e-41	-0.222222
KIRC	NLRP3	cg12280471	0.74399	0.535031	-0.475661	1.71448e-55	3.58785e-54	-0.208959
KIRC	P2RX7	cg10852165	0.422644	0.159391	-1.40687	3.38326e-60	1.10742e-58	-0.263252
KIRC	PANX1	cg16805189	0.530356	0.827883	0.642466	3.12801e-62	3.0854e-60	0.297527
KIRC	PANX1	cg01062113	0.862329	0.59867	-0.526476	1.29442e-49	1.63651e-48	-0.263658
KIRC	PANX1	cg21208539	0.637016	0.412008	-0.62866	7.60196e-45	6.48139e-44	-0.225009
KIRC	PANX1	cg24554151	0.932489	0.679738	-0.456108	2.34691e-66	7.54191e-64	-0.252751
KIRC	PANX1	cg15542639	0.910131	0.648014	-0.490051	2.55816e-65	4.97682e-63	-0.262118
KIRC	PSTPIP1	cg02371376	0.688874	0.335764	-1.0368	3.69199e-69	1.33535e-66	-0.353111
KIRC	PSTPIP1	cg16104837	0.27031	0.580966	1.10384	1.8442e-66	2.60503e-64	0.310656
KIRC	PSTPIP1	cg21322248	0.494603	0.252237	-0.971493	1.65876e-63	1.08018e-61	-0.242366
KIRP	GSDMD	cg20583945	0.597079	0.377738	-0.660538	2.67111e-16	2.61046e-15	-0.219342
KIRP	ATAT1	cg06182584	0.438633	0.696902	0.667941	7.77892e-17	8.61949e-16	0.258269
KIRP	APP	cg18274664	0.469103	0.721334	0.620764	1.74341e-19	2.32783e-18	0.252231
KIRP	APP	cg23269692	0.551028	0.798784	0.535679	5.66599e-19	6.71051e-18	0.247756
KIRP	CASP1	cg21002651	0.345516	0.0702075	-2.29905	3.45334e-23	4.02151e-21	-0.275308
KIRP	MEFV	cg26846864	0.82172	0.386597	-1.08782	9.02217e-27	1.93216e-23	-0.435123
KIRP	NFKB1	cg04799232	0.652378	0.435149	-0.584199	8.43298e-12	3.93245e-11	-0.217229
KIRP	NLRP3	cg21806273	0.631588	0.409507	-0.625095	1.15417e-12	4.10144e-12	-0.222081
KIRP	NLRP3	cg21919599	0.538548	0.332305	-0.696567	1.36724e-09	4.63274e-09	-0.206243
KIRP	PANX1	cg24554151	0.930172	0.654564	-0.506963	1.84329e-24	3.41845e-22	-0.275608
KIRP	PANX1	cg16805189	0.605527	0.894344	0.562639	1.49872e-25	4.71678e-23	0.288817
KIRP	PYCARD	cg16413327	0.916162	0.683263	-0.423162	1.95526e-20	3.19606e-19	-0.232899
LIHC	ATAT1	cg13011452	0.535293	0.751291	0.489043	3.18494e-20	1.44836e-18	0.215998
LIHC	ATAT1	cg19666256	0.429271	0.667282	0.636408	5.00249e-21	1.41505e-19	0.238011
LIHC	TLR4	cg02515422	0.443487	0.109372	-2.01965	2.11458e-25	3.89759e-23	-0.334115
LIHC	CASP1	cg13802966	0.368423	0.157564	-1.22542	1.18199e-21	4.29914e-20	-0.210858
LIHC	MEFV	cg21514871	0.374678	0.59107	0.657678	9.36736e-19	1.38703e-17	0.216392
LIHC	MEFV	cg08260052	0.503839	0.797184	0.661951	5.43444e-22	2.04622e-20	0.293345
LIHC	NLRP3	cg06710101	0.648936	0.427241	-0.603028	1.16142e-22	5.55113e-21	-0.221696
LIHC	NLRP3	cg03505654	0.394738	0.154365	-1.35455	4.25529e-21	1.26141e-19	-0.240373
LIHC	NLRP3	cg07164722	0.6309	0.373999	-0.754375	2.30766e-26	1.53082e-23	-0.256901
LIHC	NLRP3	cg21919599	0.385138	0.163653	-1.23474	4.9601e-24	5.57458e-22	-0.221485
LIHC	NLRP3	cg07313373	0.512979	0.143813	-1.8347	4.59598e-29	1.37496e-25	-0.369166
LIHC	NLRP3	cg18793688	0.89377	0.600514	-0.573704	4.32405e-11	1.57091e-10	-0.293255
LIHC	NLRP3	cg21991396	0.664445	0.426299	-0.640283	4.53142e-17	4.65153e-16	-0.238146
LIHC	NLRP3	cg14413862	0.674389	0.469118	-0.523629	3.43444e-15	2.38056e-14	-0.205271
LIHC	PSTPIP1	cg21322248	0.432582	0.116488	-1.89279	1.46852e-29	8.75116e-26	-0.316094
LIHC	PSTPIP1	cg20575191	0.316904	0.531076	0.744871	2.13082e-23	1.34199e-21	0.214172
LIHC	PSTPIP1	cg11829253	0.315371	0.520014	0.721502	1.53371e-16	1.33172e-15	0.204644
LIHC	PSTPIP1	cg16104837	0.376689	0.641524	0.76813	1.26829e-20	2.99848e-19	0.264835
LIHC	PYCARD	cg05907835	0.566689	0.305657	-0.890642	5.51247e-17	1.76797e-15	-0.261032
LUAD	CD36	cg14479884	0.46097	0.687023	0.575684	4.61178e-18	2.4478e-16	0.226052
LUAD	CD36	cg27625491	0.466657	0.667464	0.516328	1.03046e-14	1.43946e-13	0.200807
LUAD	TLR4	cg05429895	0.454848	0.230459	-0.980871	4.28485e-16	7.30167e-14	-0.224388
LUAD	NLRP3	cg07164722	0.826303	0.598332	-0.465725	4.16613e-18	3.05782e-16	-0.227971
LUAD	NLRP3	cg12280471	0.602285	0.366384	-0.717089	3.10906e-19	7.05986e-17	-0.235901
LUAD	TXNIP	cg19693031	0.43626	0.710472	0.703589	6.01225e-16	1.39196e-14	0.274212
LUSC	TLR4	cg14629571	0.897202	0.656765	-0.450054	1.42046e-20	1.33949e-19	-0.240436
LUSC	TLR4	cg05429895	0.34604	0.116122	-1.5753	2.23374e-21	1.99534e-19	-0.229918
LUSC	TLR6	cg14578677	0.711773	0.460473	-0.628302	4.68688e-19	3.12548e-18	-0.251301
LUSC	USP50	cg03622314	0.881289	0.663918	-0.40861	8.28069e-15	3.12824e-14	-0.217371
LUSC	USP50	cg01671642	0.871718	0.639053	-0.447925	7.06009e-18	3.98368e-17	-0.232665
LUSC	MEFV	cg26846864	0.759419	0.54159	-0.487697	9.14133e-22	1.10597e-20	-0.21783
LUSC	MEFV	cg08260052	0.491205	0.77079	0.650014	7.42171e-22	9.85977e-21	0.279585
LUSC	NFKB1	cg25905215	0.651258	0.872986	0.42273	2.18471e-25	1.64391e-23	0.221728
LUSC	NLRP3	cg03505654	0.415375	0.215081	-0.949534	2.6531e-15	1.06573e-14	-0.200294
LUSC	NLRP3	cg07164722	0.8632	0.581255	-0.570524	7.73584e-24	2.19067e-22	-0.281945
LUSC	NLRP3	cg21919599	0.4612	0.235939	-0.966979	1.82036e-22	2.85767e-21	-0.225261
LUSC	P2RX7	cg08688169	0.619024	0.835588	0.432797	1.34213e-22	6.19458e-21	0.216564
LUSC	P2RX7	cg22867729	0.820652	0.507974	-0.692016	1.34949e-21	1.82322e-20	-0.312678
LUSC	PSTPIP1	cg05293365	0.586272	0.287622	-1.0274	3.31659e-26	2.72988e-23	-0.29865
LUSC	PSTPIP1	cg03338933	0.473535	0.259949	-0.865241	9.29944e-24	5.98552e-22	-0.213586
LUSC	PSTPIP1	cg02371376	0.527511	0.323518	-0.705357	1.02035e-17	1.47841e-16	-0.203994
LUSC	PSTPIP1	cg20575191	0.462072	0.747197	0.69337	2.40065e-26	1.59247e-23	0.285125
LUSC	PSTPIP1	cg11829253	0.349592	0.610988	0.805472	1.06561e-23	2.95954e-22	0.261396
LUSC	PSTPIP1	cg11652496	0.459683	0.818645	0.8326	3.48742e-26	1.42117e-23	0.358963
LUSC	PSTPIP1	cg16104837	0.41997	0.652867	0.636504	2.80194e-20	2.45078e-19	0.232897
LUSC	TXNIP	cg19693031	0.363866	0.834548	1.19759	2.33252e-26	9.04452e-24	0.470682
PAAD	TLR6	cg14665413	0.401171	0.170992	-1.23029	5.86169e-05	0.00135434	-0.230179
PAAD	PANX1	cg24554151	0.884926	0.656954	-0.429766	5.13786e-06	0.00400917	-0.227972
PAAD	PANX1	cg15542639	0.868467	0.644874	-0.429454	9.82432e-06	0.00286355	-0.223593
PAAD	PYCARD	cg08730348	0.438704	0.22586	-0.957817	0.00198737	0.0111452	-0.212844
PAAD	PYCARD	cg05214748	0.450722	0.248317	-0.860053	0.00350561	0.0170703	-0.202404
PAAD	PYCARD	cg05907835	0.443357	0.241879	-0.874185	0.0029103	0.0149785	-0.201478
PAAD	TXNIP	cg19693031	0.316102	0.532025	0.751105	0.0011763	0.0113158	0.215923
READ	CARD8	cg19477346	0.64963	0.30245	-1.10292	0.000322814	0.00199699	-0.347179
READ	GSDMD	cg06043315	0.30758	0.102566	-1.58441	0.000114053	0.00244746	-0.205014
READ	ATAT1	cg19191600	0.566658	0.897529	0.663481	4.78992e-05	0.004146	0.330872
READ	ATAT1	cg03969182	0.521891	0.75234	0.527636	0.00139387	0.005888	0.230449
READ	ATAT1	cg06182584	0.270207	0.720317	1.41456	4.51418e-05	0.00130128	0.450109
READ	ATAT1	cg08188471	0.726057	0.417276	-0.79908	0.00104269	0.0039914	-0.30878
READ	ATAT1	cg16583303	0.107834	0.328713	1.60801	0.00417549	0.0110694	0.220879
READ	CD36	cg05345249	0.950455	0.690653	-0.460657	0.000856161	0.0106375	-0.259802
READ	CD36	cg18433146	0.682794	0.47716	-0.516977	0.010863	0.0319774	-0.205634
READ	CPTP	cg16432326	0.540455	0.767484	0.505962	0.000543764	0.00320903	0.227029
READ	CPTP	cg02625725	0.34642	0.611059	0.81879	4.51418e-05	0.00130128	0.264639
READ	EIF2AK2	cg05707844	0.360902	0.0896968	-2.00848	0.00667309	0.0396263	-0.271206
READ	NLRC3	cg05428433	0.901948	0.661449	-0.447414	0.000127645	0.00648766	-0.240499
READ	NLRC3	cg02819734	0.594438	0.384373	-0.629019	0.00455393	0.0203243	-0.210065
READ	NLRC3	cg07762961	0.573797	0.275888	-1.05646	5.7159e-05	0.00119305	-0.29791
READ	CASP1	cg13802966	0.427133	0.135571	-1.65564	0.00540652	0.0177746	-0.291563
READ	MEFV	cg08260052	0.591528	0.813825	0.460272	0.00313346	0.0135309	0.222297
READ	MEFV	cg00599219	0.655779	0.421382	-0.638082	0.000666513	0.00309183	-0.234397
READ	MEFV	cg03919650	0.699949	0.416185	-0.750024	4.25353e-05	0.00119305	-0.283764
READ	NFKB1	cg04799232	0.532201	0.804297	0.595758	5.39003e-05	0.0016855	0.272096
READ	NLRP3	cg21806273	0.826056	0.611476	-0.433945	9.08548e-05	0.00130128	-0.214581
READ	NLRP3	cg07313373	0.671335	0.386766	-0.795572	0.000774979	0.00327529	-0.284569
READ	PANX1	cg01062113	0.537271	0.851894	0.665025	0.000101834	0.00294325	0.314624
READ	PSTPIP1	cg11829253	0.227061	0.599335	1.40029	8.10072e-05	0.00119305	0.372274
READ	PSTPIP1	cg21322248	0.517052	0.174507	-1.56702	6.06091e-05	0.00130645	-0.342545
READ	PYCARD	cg01059100	0.446322	0.231072	-0.949741	0.00335037	0.01279	-0.21525
READ	PYCARD	cg27615603	0.629018	0.396615	-0.665361	0.000442348	0.0022873	-0.232403
READ	RELA	cg04466995	0.292506	0.688187	1.23433	4.25353e-05	0.0016855	0.395681
READ	TXNIP	cg19693031	0.261811	0.638148	1.28537	0.000120669	0.00132232	0.376337
READ	TXNIP	cg10713626	0.352665	0.140359	-1.32918	0.000602234	0.00435297	-0.212306
UCEC	CARD8	cg17152266	0.836103	0.53982	-0.631203	3.81091e-21	3.16069e-20	-0.296283
UCEC	GSDMD	cg10675725	0.319022	0.113085	-1.49625	8.8967e-25	9.93348e-23	-0.205937
UCEC	CD36	cg02325411	0.723442	0.474229	-0.609292	1.31149e-21	1.45485e-20	-0.249213
UCEC	GBP5	cg24400630	0.185087	0.51109	1.46538	3.54683e-23	4.65253e-22	0.326003
UCEC	NLRC3	cg02819734	0.822854	0.598539	-0.459192	1.95953e-13	6.05538e-13	-0.224315
UCEC	TLR4	cg13730105	0.428128	0.137485	-1.63876	2.25783e-10	2.99756e-09	-0.290642
UCEC	TLR4	cg05429895	0.37652	0.0909448	-2.04967	1.15624e-13	2.40905e-12	-0.285576
UCEC	USP50	cg03622314	0.812648	0.45419	-0.839334	2.2878e-21	1.96524e-20	-0.358458
UCEC	USP50	cg01671642	0.850525	0.423627	-1.00556	8.66216e-24	1.34326e-22	-0.426897
UCEC	MEFV	cg08260052	0.538138	0.887534	0.721827	1.7649e-24	1.13798e-22	0.349396
UCEC	NFKB1	cg01983105	0.769416	0.566316	-0.442155	8.43371e-13	2.54106e-12	-0.203099
UCEC	NFKB1	cg25905215	0.631482	0.881784	0.481685	3.76406e-27	9.24555e-25	0.250303
UCEC	NFKB1	cg04799232	0.409308	0.784843	0.939219	3.17134e-26	1.20602e-24	0.375535
UCEC	NLRP3	cg18126557	0.209945	0.452091	1.1066	1.49708e-12	4.25735e-12	0.242146
UCEC	NLRP3	cg09226051	0.0429228	0.318002	2.88922	5.19261e-13	1.75337e-12	0.275079
UCEC	NLRP3	cg25602756	0.182078	0.516307	1.50368	5.07247e-18	2.56134e-17	0.33423
UCEC	NLRP3	cg21919599	0.557623	0.340874	-0.71005	6.49664e-15	2.31657e-14	-0.216748
UCEC	NLRP3	cg07313373	0.497304	0.284536	-0.805516	2.91517e-16	1.1996e-15	-0.212768
UCEC	NLRP3	cg19023876	0.272539	0.563141	1.04703	7.00631e-15	2.61205e-14	0.290602
UCEC	P2RX7	cg00364287	0.0404884	0.257321	2.66799	1.43233e-22	1.96266e-21	0.216833
UCEC	PANX1	cg01062113	0.59153	0.856293	0.533654	6.1851e-24	3.43526e-22	0.264764
UCEC	PSTPIP1	cg16104837	0.280147	0.602409	1.10456	2.1596e-19	1.45825e-18	0.322262
UCEC	PSTPIP1	cg11829253	0.244708	0.599921	1.29371	6.28328e-23	7.81143e-22	0.355213
UCEC	PYCARD	cg09115984	0.318063	0.523088	0.717743	1.84416e-16	9.01725e-16	0.205025
UCEC	PYCARD	cg02900356	0.270336	0.499051	0.884432	1.98773e-16	9.68481e-16	0.228715

## Sheet: Table S6
Supplementary Table 6. The original data of univariate Cox regression analysis of LIHC using SPSS version 19.0 software package.
id	NLRP3 inflammasome score(0=low score group; 1=high score group)	OS(years)	Osstatus(0=Alive; 1=Dead)	RFS(years)	RFSstatus(0=No new event; 1=New event)
TCGA-ED-A66Y-01	0	0.81	1	0.81	0
TCGA-CC-A8HU-01	0	0.94	1	0.82	1
TCGA-G3-AAV6-01	0	0.18	1	0.12	1
TCGA-CC-A8HV-01	0	0.76	1	0.41	1
TCGA-DD-AADC-01	0	1.16	1	0.28	1
TCGA-DD-AAE6-01	0	0.39	0	0.29	1
TCGA-G3-A5SI-01	0	2.1	1	0.95	1
TCGA-DD-A73E-01	0	0.12	0	0.12	0
TCGA-CC-A7IF-01	0	1.78	1	0.7	1
TCGA-DD-A4NE-01	0	1.81	1	0.52	1
TCGA-BC-A3KG-01	0	1.86	0	0.57	1
TCGA-ED-A8O6-01	0	0.15	1	0.15	0
TCGA-DD-AADW-01	0	1.61	0	1.06	1
TCGA-G3-A25T-01	0	4.25	0	1.24	1
TCGA-CC-5264-01	0	0.28	1	0.28	0
TCGA-DD-AACV-01	0	4.19	0	0.94	1
TCGA-CC-A3MA-01	0	0.83	1	0.72	1
TCGA-RC-A7SH-01	0	1.28	0	0.25	1
TCGA-CC-A7IL-01	0	0.76	1	0.49	1
TCGA-DD-AAE0-01	0	1.52	0	1.52	0
TCGA-DD-A4NN-01	0	2.46	1	0.45	1
TCGA-DD-AAEG-01	0	1.97	0	1.97	0
TCGA-CC-A8HS-01	0	0.82	1	0.55	1
TCGA-DD-AACP-01	0	1.14	0	1.14	0
TCGA-DD-AADG-01	0	3.14	0	0.74	1
TCGA-DD-AADY-01	0	1.52	0	1.52	0
TCGA-DD-A3A4-01	0	1.68	1	0.24	1
TCGA-DD-AADL-01	0	1.74	0	1.74	0
TCGA-CC-A7IK-01	0	0.72	1	0.41	1
TCGA-DD-AACG-01	0	1.28	1	0.34	1
TCGA-UB-A7MA-01	0	2.32	0	0.61	1
TCGA-DD-AAD6-01	0	1.84	0	0.14	1
TCGA-DD-AAD8-01	0	3.34	0	3.34	0
TCGA-5C-A9VH-01	0	0.88	0	0.88	0
TCGA-CC-A5UD-01	0	0.83	1	0.5	1
TCGA-DD-A73B-01	0	0.78	1	0.66	1
TCGA-G3-A6UC-01	0	1.84	0	1.75	1
TCGA-DD-A3A3-01	0	1.47	1	1.47	0
TCGA-DD-AAW2-01	0	5.08	0	1.07	1
TCGA-DD-A11B-01	0	0.04	1	0.04	0
TCGA-DD-AAW3-01	0	4.47	0	4.47	0
TCGA-DD-AACQ-01	0	1.18	1	0.29	1
TCGA-FV-A2QR-01	0	1.59	1	1.54	1
TCGA-RC-A7SK-01	0	1.29	0	0.85	1
TCGA-DD-A73G-01	0	9.53	0	9.53	0
TCGA-DD-A4NK-01	0	3.32	1	0.24	1
TCGA-ED-A82E-01	0	1.12	0	1.12	0
TCGA-CC-A7IG-01	0	0.82	1	0.53	1
TCGA-DD-AAD0-01	0	0.38	0	0.13	1
TCGA-DD-A3A5-01	0	8.56	1	0.23	1
TCGA-CC-5259-01	0	0.68	0	0.49	1
TCGA-DD-A3A8-01	0	0.03	1	0.03	0
TCGA-CC-A7IH-01	0	1	0	1	0
TCGA-RC-A7SB-01	0	1.61	0	1.61	0
TCGA-KR-A7K2-01	0	2.27	0	2.27	0
TCGA-CC-A9FW-01	0	0.68	0	0.42	1
TCGA-DD-AAVU-01	0	6.03	0	4.47	1
TCGA-DD-A11A-01	0	0.22	0	0.22	0
TCGA-DD-AAE3-01	0	1.55	0	1.55	0
TCGA-DD-A118-01	0	9.42	0	1.8	1
TCGA-DD-A119-01	0	0.61	1	0.61	0
TCGA-DD-A116-01	0	4.44	1	2.27	1
TCGA-DD-AAVY-01	0	5.4	0	5.4	0
TCGA-ED-A97K-01	0	0.02	0	0.02	0
TCGA-CC-A5UC-01	0	0.95	1	0.85	1
TCGA-RC-A7S9-01	0	1.75	0	1.75	0
TCGA-5C-A9VG-01	0	0.9	0	0.9	0
TCGA-CC-A123-01	0	0.6	0	0.4	1
TCGA-CC-A3MC-01	0	0.99	0	0.81	1
TCGA-DD-AAED-01	0	2.09	0	0.54	1
TCGA-DD-A4NF-01	0	2.58	0	1.8	1
TCGA-G3-A25U-01	0	4.48	0	4.48	0
TCGA-DD-AACS-01	0	4.94	0	4.94	0
TCGA-RC-A6M5-01	0	0.04	0	0.04	0
TCGA-DD-A4NV-01	0	6.57	0	6.57	0
TCGA-MI-A75G-01	0	1.91	0	1.91	0
TCGA-DD-AAW1-01	0	5.45	0	5.45	0
TCGA-DD-AADK-01	0	2.87	0	2.87	0
TCGA-DD-AADU-01	0	1.52	0	1.52	0
TCGA-DD-A3A9-01	0	2.55	1	0.79	1
TCGA-CC-A3MB-01	0	0.86	1	0.71	1
TCGA-DD-AADQ-01	0	1.19	0	1.19	0
TCGA-G3-A25S-01	0	1.14	1	0.1	1
TCGA-DD-AADJ-01	0	2.92	0	2.92	0
TCGA-DD-AACE-01	0	5.98	0	3.5	1
TCGA-DD-A3A7-01	0	1.15	1	0.39	1
TCGA-DD-AAEB-01	0	1.31	0	1.31	0
TCGA-DD-A1EH-01	0	4.1	0	0.33	1
TCGA-DD-A1EI-01	0	0.5	0	0.5	0
TCGA-DD-AAE9-01	0	1.98	0	1.98	0
TCGA-DD-AACA-01	0	6.3	0	2.13	1
TCGA-DD-A4NP-01	0	9.06	0	3.52	1
TCGA-DD-A1EF-01	0	1.08	1	1.08	0
TCGA-DD-A1EE-01	0	0.96	1	0.12	1
TCGA-DD-A1EJ-01	0	2.75	1	0.72	1
TCGA-DD-AADM-01	0	0.03	1	0.03	0
TCGA-CC-A9FS-01	0	0.58	0	0.3	1
TCGA-G3-AAV0-01	0	1.3	0	1.3	0
TCGA-MI-A75C-01	0	0.8	0	0.8	0
TCGA-DD-AAVP-01	0	7.54	0	2.47	1
TCGA-ED-A7XO-01	0	1.17	0	0.72	1
TCGA-DD-AADV-01	0	1.57	0	1.57	0
TCGA-DD-AADF-01	0	0.32	1	0.32	0
TCGA-RC-A7SF-01	0	1.59	0	1.38	1
TCGA-5R-AA1C-01	0	1.42	0	1.42	0
TCGA-DD-AAVS-01	0	4.99	0	4.99	0
TCGA-DD-AADP-01	0	1.25	0	1.25	0
TCGA-G3-A3CJ-01	0	1.63	0	0.81	1
TCGA-DD-A4NA-01	0	2.76	0	2.76	0
TCGA-DD-AAEA-01	0	1.58	0	1.58	0
TCGA-DD-A1EK-01	0	1.53	1	0.46	1
TCGA-DD-AACY-01	0	3.97	0	2.13	1
TCGA-G3-AAV2-01	0	1.02	0	1.02	0
TCGA-DD-AAEE-01	0	2.22	0	0.61	1
TCGA-DD-AACH-01	1	0.53	1	0.23	1
TCGA-DD-A11D-01	1	4.27	1	1.36	1
TCGA-DD-AACU-01	1	4.29	0	4.29	0
TCGA-DD-A11C-01	1	1.81	0	1.81	0
TCGA-ED-A8O5-01	1	1.11	0	1.11	0
TCGA-DD-AAVZ-01	1	5.21	0	5.21	0
TCGA-DD-AAVW-01	1	6.35	0	6.35	0
TCGA-KR-A7K7-01	1	2.61	0	0.65	1
TCGA-BC-A69I-01	1	1.06	0	1.06	0
TCGA-DD-AACK-01	1	0.02	0	0.02	0
TCGA-KR-A7K0-01	1	0.18	1	0.18	0
TCGA-DD-AAE1-01	1	1.51	0	1.51	0
TCGA-DD-A3A2-01	1	5.84	1	5.84	0
TCGA-G3-AAV5-01	1	0.97	0	0.32	1
TCGA-CC-5258-01	1	0.35	1	0.35	0
TCGA-G3-AAV7-01	1	0.99	0	0.99	0
TCGA-DD-A115-01	1	6.96	1	1.28	1
TCGA-DD-AAD5-01	1	3.68	0	0.36	1
TCGA-DD-A39W-01	1	2.27	1	2.27	0
TCGA-DD-AACO-01	1	5.14	0	1.31	1
TCGA-DD-AACW-01	1	3.9	0	3.9	0
TCGA-CC-5261-01	1	0.27	1	0.27	0
TCGA-DD-AACN-01	1	3.57	0	0.98	1
TCGA-DD-A4NB-01	1	2.71	0	2.5	1
TCGA-DD-AAC9-01	1	0.95	0	0.95	0
TCGA-CC-5260-01	1	0.24	1	0.24	0
TCGA-CC-A5UE-01	1	0.75	1	0.48	1
TCGA-DD-AACD-01	1	1.04	1	0.41	1
TCGA-G3-A25Z-01	1	1.79	0	1.79	0
TCGA-DD-AAE7-01	1	1.76	0	1.76	0
TCGA-G3-A25Y-01	1	1.24	1	0.97	1
TCGA-G3-A25X-01	1	4.87	0	4.87	0
TCGA-DD-A4NO-01	1	6.15	0	2.71	1
TCGA-ED-A7XP-01	1	1.1	0	0.51	1
TCGA-DD-AADA-01	1	3.38	0	3.38	0
TCGA-MI-A75E-01	1	1.39	0	1.39	0
TCGA-DD-AACT-01	1	4.28	0	4.28	0
TCGA-PD-A5DF-01	1	1.75	1	1.75	0
TCGA-CC-A7IE-01	1	0.59	1	0.46	1
TCGA-DD-A4NH-01	1	2.51	0	0.44	1
TCGA-G3-A3CG-01	1	1.84	0	0.9	1
TCGA-G3-AAUZ-01	1	1.32	0	1.32	0
TCGA-DD-AAC8-01	1	0.04	1	0.04	0
TCGA-DD-A4NQ-01	1	1.02	1	0.35	1
TCGA-DD-AADR-01	1	5.56	0	4.66	1
TCGA-G3-AAV4-01	1	0.07	1	0.07	0
TCGA-DD-A3A1-01	1	0.64	1	0.64	0
TCGA-DD-A4NL-01	1	4.69	0	4.69	0
TCGA-DD-A4NJ-01	1	2.54	0	1.5	1
TCGA-2Y-A9H0-01	1	10.07	0	10.07	0
TCGA-DD-A113-01	1	6.64	0	4.59	1
TCGA-RG-A7D4-01	1	3.01	0	3.01	0
TCGA-DD-A1EB-01	1	5.53	0	1.38	1
TCGA-DD-AADO-01	1	1.24	0	1.24	0
TCGA-DD-AAD2-01	1	1.8	0	1.8	0
TCGA-DD-AACX-01	1	0.47	0	0.12	1
TCGA-FV-A23B-01	1	5.07	1	3.98	1
TCGA-BC-4072-01	1	4.08	1	1.3	1
TCGA-DD-AACJ-01	1	5.76	0	0.27	1
TCGA-DD-AADB-01	1	3.4	0	3.4	0
TCGA-G3-AAV1-01	1	0.98	1	0.13	1
TCGA-DD-AADI-01	1	2.97	0	2.97	0
TCGA-DD-AADD-01	1	3.37	0	3.37	0
TCGA-G3-A25V-01	1	2.36	0	1.34	1
TCGA-DD-A4ND-01	1	7.52	0	0.04	1
TCGA-DD-AAVR-01	1	6.88	0	6.88	0
TCGA-DD-AACF-01	1	1	1	0.33	1
TCGA-CC-5262-01	1	0.28	1	0.28	0
TCGA-DD-A73C-01	1	1.92	0	1.55	1
TCGA-5C-AAPD-01	1	0.05	0	0.05	0
TCGA-BD-A3EP-01	1	1.12	0	1.12	0
TCGA-ED-A66X-01	1	1.11	0	0.34	1
TCGA-DD-A1EG-01	1	3.76	1	2.4	1
TCGA-DD-A1ED-01	1	6.3	0	6.3	0
TCGA-ED-A459-01	1	2.49	0	2.49	0
TCGA-DD-AAVV-01	1	6.73	0	6.73	0
TCGA-DD-A73A-01	1	1.99	0	1.99	0
TCGA-CC-5263-01	1	0.35	1	0.35	0
TCGA-G3-A3CI-01	1	0.49	0	0.49	0
TCGA-DD-AAE2-01	1	1.75	0	1.75	0
TCGA-KR-A7K8-01	1	2.48	0	2.48	0
TCGA-5R-AAAM-01	1	0.13	1	0.13	0
TCGA-CC-A8HT-01	1	0.38	1	0.23	1
TCGA-DD-AACI-01	1	4.43	0	3.92	1
TCGA-G3-A3CH-01	1	2.14	0	0.32	1
TCGA-DD-AAD1-01	1	1.55	0	0.35	1
TCGA-DD-A1EA-01	1	6.62	0	2.07	1
TCGA-DD-AACB-01	1	6.37	0	6.37	0
TCGA-5R-AA1D-01	1	1.23	0	1.23	0
TCGA-DD-AAE4-01	1	1.67	0	0.3	1
TCGA-DD-AAW0-01	1	5.52	0	5.52	0
TCGA-DD-AADS-01	1	1.3	0	1.3	0
TCGA-DD-A4NS-01	1	6.73	1	2.45	1
TCGA-DD-AAD3-01	1	3.55	0	3.55	0
TCGA-ED-A4XI-01	1	2.24	0	2.24	0
TCGA-DD-AAEK-01	1	2.92	0	2.92	0
TCGA-DD-AAEI-01	1	4.19	0	1.35	1
TCGA-DD-AACL-01	1	0.29	1	0.29	0
TCGA-DD-AAVQ-01	1	7.47	0	4.13	1
TCGA-G3-A3CK-01	1	1.6	0	1.6	0
TCGA-DD-A4NR-01	1	0.02	1	0.02	0
TCGA-DD-A3A6-01	1	8.93	1	8.93	0
TCGA-XR-A8TD-01	1	2.82	0	2.82	0
TCGA-G3-AAV3-01	1	1.13	0	1.13	0
TCGA-DD-A73F-01	1	2.97	0	2.97	0
TCGA-DD-AACZ-01	1	0.47	1	0.24	1
TCGA-DD-AAEH-01	1	2.15	0	1.76	1
TCGA-DD-AAVX-01	1	4.71	0	1.08	1
TCGA-DD-AACC-01	1	4.62	1	1.47	1
TCGA-CC-A1HT-01	1	0.28	1	0.28	0
TCGA-DD-A1EC-01	1	1.65	0	0.82	1
TCGA-BC-A8YO-01	1	1.54	0	0.6	1
TCGA-CC-A7IJ-01	1	1.05	0	1.05	0
TCGA-ED-A5KG-01	1	2.34	0	0.3	1

## Sheet: Table S7
Supplementary Table 7.The original data of NLRP3 inflammasome score in GEO datasets.
BLCA-Normal	BLCA-Tumor	COAD-Normal	COAD-Tumor	ESCA-Normal	ESCA-Tumor	GBM-Normal	GBM-Tumor	HNSC-Normal	HNSC-Tumor	KIRC-Normal	KIRC-Tumor	KIRP-Normal	KIRPTumor	LIHC-Normal	LIHCTumor	LUAD-Normal	LUAD-Tumor	LUSC-Normal	LUSC-Tumor	PAAD-Normal	PAAD-Tumor	PCPG-Normal	PCPG-Tumor	READ-Normal	READ-Tumor	SKCM-Normal	SKCM-Tumor	UCEC-Normal	UCEC-Tumor
0.748381	0.257662	0.916602	0.155	0.748168	0.956544	0.495303	0.476013	0.755963	0.539513	0.20493	0.560099	0.138038	0.302844	0.938908	0.470919	0.938503	0.575432	0.667923	0.645147	0.499307	0.677368	0.69518	0.3403	0.387701	0.4282	0.27574	0.598302	0.32841	0.190198
0.735118	0	0.932512	0.536658	0.244221	0.855211	0.405671	0.031075	0.309717	0.228428	0.091582	0.729019	0	0.238106	1	0.425591	0.751728	0.246484	0.743508	0.424084	0.410891	0.577624	0.766642	0.499864	0.223312	0.27494	0.302369	0.776624	0.358601	0
0.735074	0.692346	0.617908	0.482893	0.286215	0.74252	0.073419	0.872139	0.498709	0.676078	0.149435	0.542904	0.203714	0.392705	0.990479	0	0.92214	0.249776	0.763051	0.302653	0.641267	0.629897	0.750944	0.402465	0.450429	0.152228	0.505321	0.582561	0.248901	0.262199
0.690253	0.631177	0.427747	0.706221	0.391391	0.472972	0.127578	0.353345	0.509428	0.449932	0.221009	0.60253	0.257522	0.327469	0.889889	0.584915	0.977068	0.283492	0.993248	0.657989	0.383087	0.495776	0.774694	0.512864	0.167008	0.181188	0.418232	0.301286	0.440084	0.136662
0.708855	0.385833	0.472527	0.774346	0.453069	0.508877	0.000246	0.227418	0.067655	0.414966	0.371068	0.722255	0.219528	0.437096	0.799357	0.835066	0.674394	0.68039	0.815777	0.392945	0.428178	0.248368	0.718316	0.54475	0.377954	0.24372	0.482172	0.253365	1	0.437645
0.76323	0.614086	0.579205	0.486823	0	0.976824	0.158697	0.485182	0.242018	1	0.221296	0.363112		0.372447	0.599693	0.613312	0.776549	0.554939	0.468717	0.481528	0.479578	0.206012	0.702937	0.598071	0.286757	0.224886	0.568856	0.576936		0.181098
0.78357	0.493394	0.736121	0.433421	0.484715	0.560454	0.255917	0.841846	0.270485	0.601263	0.023233	0.626618		0.427245	0.9299	0.48135	0.601754	0.758913	0.26413	0.27639	0.607667	0.373048		0.648845	0.407472	0.083435	0.342808	0.514437		0.084835
0.670929	0.56221	0.713402	0.727854	0.491407	0.634893	0.454381	0.565078	0.114264	0.812914	0.123421	0.515423		0.499173			0.771147	0.615392	0.664032	0	0.427122	0.411897		0.521653	0.415029	0.308279	0.352096	0.56813
0.716181	0.431771	0.864755	0.611023	0.538053	0.781035	0	1	0.735654	0.012304	0.317828	0.812669		0.492584			0.762701	0.329776	0.714512	0.294626	0.461909	0.49098		0.470814	0.362148	0.322704		0.340995
0.533795	0.427728	0.649066	0.730123	0.781304	0.871278		0.461561	0.566654	0.614136	0.039303	0.550674		0.298328			0.71215	0.492766	0.84515	0.606028	0.550735	0.521977		0.706798	0.32116	0.244614		0.343858
0.577338	0.577543	0.875572	0.408905	0.507119	0.545167		0.411188	0.86366	0.618902	0.195882	0.679863		0.797925			0.928894	0.115761	1	0.28973	0.422266	0.426314		0.365441	0.455219	0.189307		0.300453
0.648849	0.617619	0.710748	0.897684	0.496823	0.880515		0.413262	0.597484	0.586481	0.119323	0.55775		0.909494			0.885537	0.424278	0.892464	0.466326	0.611847	0.559511		0.735524	0.38824	0.307165		0.505054
0.816304	0.711668	0.787488	0.734283	0.339463	0.496676		0.343157	0	0.891616	0.07338	0.845034		0.918492			0.72432	0.353388	0.650927	0.326094	0.638928	0.549137		0.556227	0.420675	0.253793		0.05643
0.466287	0.454358	0.710179	0.712023	0.913619	0.716407		0.800911	0.075799	0.023108	0.241067	0.710545		1			0.794993	0.537962	0.712379	0.851573	0.488896	0.489916		0.559083	0.286262	0.511829		0.533061
0.606463	0.329674	0.683704	0.66654	0.449401	0.614794		0.125238	0.043192	0.33858	0.147549	0.6997		0.514013			0.572229	0.314646		0.685201	0.517165	0.535405		0.271415	0.392529	0.329809		0.523494
0.591733	0.419872	0.769544	0.65952	0.562431	0.572907		0.510477	0.100386	0.510441	0.040901	0.92364		0.402183			0.747046	0.586049		0.258454	0.542998	0.515384		0.580239	0.375211	0.187115		0.679148
0.724983	0.503614	0.678563	0.596091	0.547815	0.494682			0.15906	0.618899	0.149223	0.55445		0.600434			0.809236	0.452816		0.520158	0.677137	0.322121		0.408513	0.205951	0.012333		0.567221
0.70043	0.575114	0.342718	0.371854	0.697321	0.578925			0.407059	0.986527	0.332764	0.569212		0.639136			0.628382	0.765854		0.473542	0.439923	0.564997		0.890072	0.358566	0.541538		0.431267
0.782198	0.553556	0.447062	0.652202	0.240767	1			0.564089	0.480079	0.11541	0.709668		0.747704			0.940985	0.512618		0.386907	0.396907	0.430919		0	0.521298	0.222971		0.49964
0.764867	0.501829	0.478631	0.696606		0.479947			0.495499	0.654272	0.144216	0.725501					0.871768	0.440906		0.236868	0.350752	0.351391		0.455983	0.2013	0.344063		0.508512
0.67509	0.535189	0.547574	0.209762		0.365145			0.485697	0.383132	0	0.864771					0.681717	0.472245		0.64616	0.334147	0.518616		0.59164	0.406524	0.236665		0.338225
0.647463	0.506568	1	0		0.821359			0.273029		0.392616	0.484205					0.876153	0.428222		0.361793	0.330884	0.29392		0.265359	0.258698	0.2428		0.615051
0.64965	0.391867	0.610302	0.187575		0.636421			0.03522		0.10617	0.638282					0.791154	0.471133		0.758989	0.503815	0.388156		0.71597	0.467742	0.401488		0.219936
0.599456	0.668225	0.796163	0.490305		0.801071						0.768264					0.578793	0.247026		0.365821	0.549841	0.297854		0.617444	0.493179	0.225865		0.310552
0.782499	0.618822	0.224921	0.428897		0.74042						0.610073					0.772482	0.372963		0.58445	0.41768	0.420072		0.512318	0.454878	0.325506		0.395945
0.72578	0.388613	0.271788	0.479874		0.521185						0.390875					0.60537	0.590129		0.520385	0.571104	0.423969		0.451428	0.288169	0.333546		0.567173
0.683883	0.539191	0.435154	0.35047		0.591318						1					0.882574	0.563814		0.768258	0.548415	0.541316		0.571653	0.426499	0.35001		0.608843
0.742694	0.517271	0.434611	0.770696		0.528518						0.708648					0.749843	0.581874		0.535268	0.544441	0.401941		0.537895	0.717331	0.240427		0.373225
0.695737	0.556212	0.614165	0.88965		0.754917						0.565529					0.661603	0.159346		0.165961	0.461818	0.506075		0.381961	0.328618	0.148104		0.390924
0.655272	0.564264	0.58463	0.718204		0.556668											0.786114	0.818405		0.05839	0.550218	0.485981		0.614341	0.390522	0.351241		0.290742
0.740222	0.58857	0.559929	0.423866													0.900361	0.34541		0.567178	0.687897	0.350272		0.920776	0.319984	0.124357		0.550778
0.706081	0.651117	0.812799	0.129416													0.800215	0.580447		0.281821	0.477542	0.520293		0.539677	0.43815	0.361318		0.445049
0.821892	0.670052	0.441614	0.244394													0.718118	0.774427		0.31411	0.406758	0.471102		0.707054	0.211831	0.175087		0.395879
0.79428	0.433667	0.665623	0.624186													0.738455	0.342285		0.265616	0.472559	0.511013		0.874589	0.22316	0.368486		0.800632
0.664693	0.507735	0.793551	0.619444													0.680796	0.32772		0.800309	0.390502	0.292947		0.415933	0.270583	0.17233		0.771068
0.785904	0.550037	0.594553	0.632129													0.646361	0.550833		0.247571	0.300024	0.584253		0.384027	0.433273	0.190959		0.125184
0.836148	0.503923	0.773051	0.601777													0.862495	0.237107		0.06164	0.250082	0.501964		0.739366	0.370894	0.407037		0.185813
0.660136	0.574961	0.387201	0.390743													0.607018	0.211894		0.08326	0.183771	0.699753		0.758977	0.198465	0.175215		0.480222
0.696168	0.48624	0.515756	0.790077													0.750436	0.485084		0.485426	0.306431	0.542625		0.71818	0.275408	0.39595		0.628024
0.739271	0.591601	0.730914	0.777281													0.500259	0.820326		0.496545	0.307346	0.385969		0.400533	0.363122	0.140166		0.530282
0.747161	0.686239	0.810955	0.58574													0.775193	0		0.43096	0.548145	0.391304		0.79043	0.308656	0.272662		0.608435
0.703665	0.533325	0.78222	0.967365													1	0.68117		0.340263	0.512838	0.254572		0.515182	0.560782	0.166907		0.724276
0.693115	0.544662	0.928939	0.625784													0.794423	0.73618		0.339831	0.239401	0.465463		0.598149	0.270117	0.305054		0.117149
0.630606	0.531315	0.814071	0.459752													0.865323	0.318502		0.615542	0.352336	0.360718		0.461686	0.473111	0.09972		0.604491
0.789322	0.622135	0.898502	0.202564													0.433037	0.070919		0.690671	0.330496	0.535397		0.486884	0.216071	0.2547		0.790851
0.763739	0.755947		0.475276													0.477089	0.466798		0.243531	0.305887	0.494833		0.616646	0.353231	0.400111		0.532895
0.553079	0.53445		0.574217													0.804341	0.52205		0.55626		0.4609		0.887919	0.244146	0.210968		0.11452
0.703877	0.400269		0.643998													0.966086	0.315449		0.676842		0.577645		0.447087	0.215437	0.219906		0.766085
0.736904	0.493114		0.46106													0.556513	0.191276		0.06009		0.273878		0.823007	0.318087	0.313615		0.217338
0.678623	0.657191		0.453219														0.542556		0.137508		0.435956		0.395434	0.26823	0.350612		0.764565
0.690069	0.601025		0.675854														0.37289		0.528788		0.454059		0.625828	0.241986	0.232712		0.690746
0.598852	0.641549		0.411504														0.361869		0.179877		0.422318		0.430481	0.250563	0.357543		0.583955
0.782073	0.605161		0.459102														0.064575		0.03846		0.437728		0.294118	0.517956	0.173169		0.54928
0.740701	0.614574		0.829193														0.309619		0.290043		0.330191		0.399857	0.327005	0.447223		0.431396
0.701816	0.510639		0.763835														0.121217		0.59907		0.512361		0.298907	0.331517	0.154379		0.439356
0.630552	0.577601		0.369552														0.484056		0.142603		0.445801		0.460986	0.421403	0.05767		0.204332
0.729222	0.489947		0.436948														0.654606		0.537225		0.537216		0.441881	0.340587	0.125619		0.606749
0.673801	0.550381		0.900662														0.87913		0.311253		0.462062		0.684675	0.373817	0.172891		0.544795
0.464678	0.635821		0.473066																0.452886		0.356138		0.764153	0.348541	0.645366		0.56881
0.689328	0.582956		0.611482																0.394162		0.41686		0.490613	0.401328	0.264442		0.689002
0.67835	0.544488		0.617402																0.3126		0.611067		0.93593	0.283462	0.365587		0.286413
0.557701	0.416105		0.479736																		0.493642		0.726586	0.343004	0.153329		0.683227
0.760269	0.504245		0.556847																		0.466027		0.731266	0.335761	0.275032		0.607823
0.681589	0.57019		0.555842																		0.503852		0.556149	0.471511	0.287741		0.783411
0.848648	0.464038		0.97165																		0.456248		0.478451	0.299565	0.428088		0.518795
0.750242	0.577244		0.906178																		0.524843		0.692445	0.636882	0.348934		0.731062
0.667272	0.402689		0.557141																		0.399762		0.555429	0.49734	0.349305		0.503539
	0.483824		0.592433																		0.528804		0.419918	0.401732	0.273403		0.511598
	0.61882		0.597525																		0.51733		0.258893	0.365322	0.289394		0.673827
	0.704619		0.710244																		0.394312		0.657113	0.28228	0.289985		0.628781
	0.39127		0.732256																		0.307189		0.616387	0.266226	0.150762		0.423799
	0.549651		0.466673																		0.493263		0.288381	0.278714	0.23787		0.320392
	0.710782		0.358186																		0.411577		0.615472	0.300936	0.212471		0.354489
	0.511101		0.764406																		0.50241		0.670746	0.273809	0.060666		0.799052
	0.600742		0.630475																		0.497047		0.250158	0.130458	0.250296		0.79344
	0.483449		0.367757																		0.492789		0.470853	0.317829	0.274013		0.641543
	0.660959		0.337348																		0.345601		0.340598	0.313989	0.422582		0.71168
	0.527017		0.733352																		0.557668		0.597653	0.211566	0.251698		0.716016
	0.440734		0.714883																		0.701654		0.499134	0.394201	0.269254		0.736024
	0.679311		0.445463																		0.232318		1	0.390887	0.206425		0.472947
	0.537488		0.733852																		0.537464		0.883143	0.433815	0.29127		0.709157
	0.565047		0.388487																		0.444609		0.504873	0.321878	0.177919		0.600733
	0.753516		0.484075																		0.602498		0.682592	0.309804	0.24383		0.63691
	0.452327		0.55611																		0.495152		0.739874	0.4021	0.649032		0.717368
	0.560196		0.913044																		0.525809			0.304936	0.173677		0.672789
	0.559316		0.386686																		0.536679			0.334325	0.218639		0.605027
	0.542063		0.512522																		0.590997			0.210815	0.356665		0.599871
	0.505005		0.573183																		0.422352			0.275773	0.458067		0.500076
	0.628934		0.481598																		0.435259			0.208195	0.261534		0.697773
	0.740534		0.287456																		0.39849			0.275914	0.357679		0.724314
	0.557008		0.361412																		0.448101			0.441183	0.208136		0.691219
	0.822032		0.370091																		0.449367			0.374618	0.193959		0.979792
	0.67125		0.61678																		0.580869			0.275365	1		1
	0.617013		0.497165																		0.640587			0.403729	0.282237		0.428507
	0.685144		0.631719																		0.647761			0.469273	0.268721		0.711862
	0.434858		0.521977																		0.405196			0.223926	0.485812		0.60438
	0.373668		0.644398																		0.47422			0.351794	0.253155		0.72086
	0.65472		0.664593																		0.353951			0.212763	0.452612		0.711586
	0.622754		0.559961																		0.739794			0.405191	0.207989		0.529424
	0.364466		0.675718																		0.487338			0.304061	0.268937		0.529736
	0.784813		0.380785																		0.424794			0.388203	0.210339		0.61941
	0.644388		0.245297																		0.445059			0.380206	0.435219		0.92316
	0.562276		0.442348																		0.516284			0.514184	0		0.767416
	0.594026		0.535312																		0.478831			0.382365	0.167155		0.701666
	0.515119		0.551728																		0.426965			0.389333	0.272654
	0.513386		0.596252																		0.370032			0.3399	0.221725
	0.67122		0.567505																		0.452551			0.269664	0.290482
	0.495932		0.685167																		0.31701			0.363819	0.237312
	0.471187		0.043796																		0.490662			0.393736	0.242232
	0.507367		0.564545																		0.544977			0.21831	0.389103
	0.698914		0.424846																		0.435452			0.406084	0.552026
	0.539798		0.277525																		0.553264			0.275346	0.515853
	0.525751		0.20937																		0.602874			0.289399	0.132741
	0.616865		0.871244																		0.516319			0.366427	0.855254
	0.586408		0.541656																		0.213838			0.257855	0.450482
	0.718182		0.434501																		0.481602			0.368474	0.196471
	0.408621		0.730655																		0.344648			0.375158	0.177151
	0.656004		0.417225																		0.621742			0.347059	0.169822
	0.435608		0.6264																		0.468381			0.298945	0.233567
	0.525845		0.680675																		0.518641			0.297563	0.323989
	0.526337		0.732893																		0.484919			0.226285	0.300969
	0.61611		0.428904																		0.501317			0.213956	0.224476
	0.670217		0.743316																		0.488723			0.28784	0.238152
	0.710136		0.676276																		0.327558			0.421549	0.851992
	0.434563		0.60902																		0.409436			0.308113	0.382715
	0.553443		0.295044																		0.370988			0.347923	0.163622
	0.608767		0.387468																		0.222744			0.296939	0.345908
	0.812679		0.49724																		0.354407			0.274188	0.40258
	0.827463		0.500906																		0.365015			0.192564	0.312528
	0.384325		0.1992																		0.479324			0.296177	0.252687
	0.374735		0.484466																		0.485188			0.343578	0.277119
	0.37527		0.491956																		0.354942			0.435338	0.097294
	0.502219		0.769304																		0.46588			0.336724	0.388121
	0.538983		0.604929																		0.281542			0.146033	0.671793
	0.591817		0.371159																		0.391845			0.515047	0.168323
	0.667356		0.644676																		0.541774			0.349531	0.522616
	0.608824		0.65984																		0.625779			0.295408	0.303125
	0.205999		0.564982																		0.243658			0.231792	0.245171
	0.539305		0.751106																		0.448502			0.804637	0.374519
	0.761506		0.620616																		0.451793			0.244347	0.562329
	0.643719		0.507283																		0.563951			0.303704	0.502049
	0.790497		0.719656																		0.452353			0.367829	0.157039
	0.506771		0.71593																		0.207073			0.62171	0.129327
	0.547289		0.460602																		0.497712			0.120629	0.525143
	0.760813		0.737427																		0.297424			0.258399	0.162361
	0.545261		0.249798																					0.408574	0.730315
	0.67776		0.723063																					0.334671	0.210407
	0.526148		0.400536																					0.305521	0.154653
	0.483777																							0.339603	0.192284
	0.651097																							0.294305	0.372623
	0.496172																							0.366848	0.291051
	0.614195																							0.040719	0.065525
	0.496237																							0.284567	0.587365
	0.69671																							0.289711	0.327341
	0.582041																							0.334164	0.276057
	0.316036																							0.26936	0.611274
	0.624934																							0.409414	0.207282
	0.631679																							0.274413	0.120344
	0.733496																							0.284519	0.159011
	0.586479																							0.386674	0.302763
	0.574401																								0.240049
	1																								0.175085
	0.487207																								0.296912
	0.447084																								0.391187
	0.816673																								0.49851
	0.347121																								0.36347
	0.517109																								0.161433
	0.558244																								0.273894
	0.684605																								0.295685
	0.509174																								0.49702
	0.559478																								0.215132
	0.433165																								0.314304
	0.42034																								0.113552
	0.455754																								0.31559
	0.679243																								0.377192
	0.441034																								0.408471
	0.46211																								0.341725
	0.492799																								0.260299
	0.733136																								0.19567
	0.78934																								0.229809
	0.577775																								0.2229
	0.436827																								0.348913
	0.422454																								0.444057
	0.340793																								0.337475
	0.541691																								0.044238
	0.477834																								0.207007
	0.538147																								0.320636
	0.617073																								0.363237
																									0.279582
																									0.287363
																									0.428671
																									0.480679
																									0.703948
																									0.340742
																									0.581321
																									0.160636
																									0.429353
																									0.166701
																									0.253075
																									0.2468
																									0.217547
																									0.097583
																									0.342814

## Sheet: Table S8
Supplementary Table 8. Correlations of NLRP3 inflammasome activity with immune signatures in 15 cancer types.
CYT: immune cytolytic activity; HLA: human leukocyte antigen; IFN: interferon response; TILs: tumor-infiltrating lymphocytes
	R value
cancer type	CYT	HLA	IFN	TILs
BLCA	0.854726	0.812021	0.827867	0.833038
COAD	0.615816	0.698896	0.774959	0.799632
ESCA	0.668436	0.570408	0.663391	0.62675
GBM	0.61565	0.66662	0.702532	0.775049
HNSC	0.61611	0.578964	0.71318	0.627166
KIRC	0.70028	0.70028	0.67154	0.815552
KIRP	0.760739	0.784898	0.743317	0.891627
LIHC	0.691672	0.742976	0.786386	0.821711
LUAD	0.720518	0.675162	0.78617	0.841989
LUSC	0.701608	0.724341	0.776318	0.79639
PAAD	0.761512	0.786232	0.781699	0.876877
PCPG	0.669839	0.632346	0.717227	0.804035
READ	0.633374	0.728021	0.808105	0.835926
SKCM	0.806234	0.804183	0.84037	0.85119
UCEC	0.718681	0.679287	0.785687	0.846726

## Sheet: Table S9
Supplementary Table 9. Correlations of the expression of 30 NLRP3-inflammasome-related genes with immune signatures in 15 cancer types.
CYT: immune cytolytic activity; HLA: human leukocyte antigen; IFN: interferon response; TILs: tumor-infiltrating lymphocytes
CYT																																CYT
R value	ARRDC1-AS1	CARD8	GSDMD	ATAT1	CD36	CPTP	DHX33	EIF2AK2	GBP5	NLRC3	PYDC2	SIRT2	TLR4	TLR6	USP50	APP	CASP1	HSP90AB1	MEFV	NFKB1	NFKB2	NLRP3	P2RX7	PANX1	PSTPIP1	PYCARD	RELA	SUGT1	TXN	TXNIP		P value	ARRDC1-AS1	CARD8	GSDMD	ATAT1	CD36	CPTP	DHX33	EIF2AK2	GBP5	NLRC3	PYDC2	SIRT2	TLR4	TLR6	USP50	APP	CASP1
BLCA	0.010976	0.024321	0.344064	-0.42704	-0.13792	-0.24244	-0.14206	0.245263	0.486568	0.503452	-0.03692	-0.04777	0.1764	0.444262	-0.08404	0.174106	0.505287	0.06907	0.245154	0.274772	0.334469	0.490399	0.492541	0.376983	0.562688	0.217173	-0.05551	0.026168	0.234054	-0.00767		BLCA	0.830679	0.635595	4.68258e-12	2.30471e-18	0.00694146	1.63001e-06	0.0054112	1.22083e-06	4.24546e-24	6.11219e-26	0.471844	0.351755	0.000532994	6.57151e-20	0.100976	0.000631152	3.80025e-26
COAD	-0.10644	0.117965	0.355299	-0.31279	0.197039	-0.02448	-0.0603	0.20444	0.605882	0.544412	-0.01981	-0.07514	0.037665	0.389848	0.063518	-0.16631	0.454959	-0.10428	0.430431	0.239906	0.404214	0.379718	0.421381	0.260313	0.573581	0.019181	0.083577	-0.13759	-0.0985	0.063579		COAD	0.0447583	0.0260335	4.95543e-12	1.61013e-09	0.000183005	0.645289	0.256433	0.000102366	4.78428e-37	7.35751e-29	0.709557	0.157166	0.478683	2.27741e-14	0.231909	0.00163946	1.37144e-19
ESCA	0.06459	0.120058	0.249806	-0.07208	-0.10453	-0.01408	-0.1954	0.004283	0.526648	0.47789	0.151427	-0.07673	0.104943	0.063885	0.098093	-0.01305	0.228684	-0.0781	0.102774	0.121464	0.182358	0.185686	0.20256	0.04032	0.418216	0.106071	0.101967	-0.09196	0.023958	0.165294		ESCA	0.433866	0.144722	0.0021231	0.382347	0.204576	0.864678	0.0169346	0.95866	5.24321e-12	7.12975e-10	0.0652589	0.352331	0.202759	0.438907	0.233983	0.874506	0.00502847
GBM	-0.37424	0.029178	0.384116	-0.45918	0.113178	-0.17452	-0.46792	-0.09966	0.342157	-0.02238	-0.1565	-0.22686	0.187998	0.384787	-0.1288	0.09367	0.576959	-0.09993	0.34893	0.275531	0.249081	0.431485	-0.23954	-0.09613	0.480643	0.641291	-0.36996	-0.33077	0.265654	0.126504		GBM	2.38505e-06	0.72301	1.21875e-06	3.41974e-09	0.167902	0.0326829	1.5641e-09	0.224984	1.82272e-05	0.785747	0.0558072	0.00524317	0.0212333	1.16349e-06	0.116234	0.254234	1.0973e-14
HNSC	0.091709	0.367485	0.393983	-0.12281	-0.12019	-0.10614	-0.16019	0.266018	0.514076	0.540765	-0.08483	0.014912	0.297235	0.159971	0.043213	-0.07104	0.409127	-0.09292	0.08897	0.128165	0.261873	0.182985	0.247826	-0.07758	0.360853	0.168007	-0.03687	0.004359	0.066483	0.260202		HNSC	0.0469121	1.78693e-16	6.66643e-19	0.0076878	0.0091034	0.0213643	0.000489936	4.69463e-09	4.61969e-33	4.76272e-37	0.0661388	0.747115	4.83453e-11	0.000499008	0.349902	0.124051	2.15856e-20
KIRC	-0.17988	0.281868	0.279526	-0.09323	0.090511	0.049544	-0.17452	0.018193	0.511911	0.546106	-0.18108	0.053864	0.233711	0.307382	0.004986	-0.17738	0.632851	-0.25332	0.179383	0.15699	0.291158	0.282887	0.335578	0.027473	0.548048	0.318413	0.082312	-0.01639	0.103511	0.055322		KIRC	7.52758e-05	3.37141e-10	4.77646e-10	0.0413909	0.047725	0.279187	0.000123511	0.691247	2.37004e-33	1.38114e-38	6.72358e-05	0.239338	2.2979e-07	6.11286e-12	0.913324	9.50273e-05	5.78684e-55
KIRP	-0.19909	0.208204	0.121879	-0.34242	0.315537	0.087328	-0.3128	-0.17133	0.506477	0.295879	0.026264	0.279781	0.343064	0.31066	-0.24026	-0.3196	0.456975	-0.06409	0.241729	-0.14345	0.329979	0.453831	0.435768	0.050201	0.638615	0.324385	0.054244	-0.28127	0.095767	-0.15677		KIRP	0.000961866	0.000548401	0.0446091	6.72782e-09	1.05818e-07	0.150897	1.37964e-07	0.00460197	3.96503e-19	6.73054e-07	0.66629	2.77298e-06	6.27898e-09	1.69598e-07	6.25224e-05	7.09932e-08	1.9355e-15
LIHC	-0.12438	0.036421	0.172331	-0.24862	-0.06025	-0.09475	-0.11202	-0.06817	0.28968	0.428101	-0.08243	-0.03442	0.209566	0.146714	0.048808	-0.12771	0.49832	-0.1246	0.220911	0.035382	0.042737	0.36351	-0.09462	-0.16307	0.639181	0.148983	-0.09135	0.00516	0.046101	0.017951		LIHC	0.0187234	0.492734	0.00107866	1.97426e-06	0.256204	0.0737861	0.0343672	0.1988	2.488e-08	2.41895e-17	0.120031	0.516801	6.60314e-05	0.00547939	0.35783	0.0157564	8.33714e-24
LUAD	0.055917	0.181626	0.173084	-0.22875	0.066133	-0.06815	-0.12429	-0.07465	0.600543	0.542325	-0.05427	0.093958	0.307636	0.069284	-0.15626	-0.17127	0.475767	-0.12979	0.214389	0.200463	0.28243	0.23448	0.382895	0.030876	0.603742	0.263102	0.05131	-0.1976	0.030691	0.088332		LUAD	0.225301	7.23239e-05	0.000157499	5.07872e-07	0.151419	0.1393	0.00685851	0.10529	1.36079e-47	1.91186e-37	0.239243	0.0413107	8.36108e-12	0.132829	0.000657101	0.000184917	4.92641e-28
LUSC	0.00067	0.361029	0.343425	-0.25091	0.032862	-0.08092	-0.22038	0.111849	0.511082	0.446105	-0.10244	-0.16183	0.357355	0.311548	0.052939	-0.13321	0.42271	-0.11239	0.369592	0.213045	0.278938	0.435408	0.497274	-0.00258	0.407696	0.199991	-0.00461	-0.05117	-0.00083	0.289908		LUSC	0.98838	4.53706e-16	1.3555e-14	2.97414e-08	0.474909	0.0781062	1.23284e-06	0.0147305	5.74443e-33	1.31535e-24	0.0255687	0.00039866	9.38325e-16	3.76469e-12	0.24951	0.00363173	5.1977e-22
PAAD	-0.23586	0.533661	-0.06077	-0.39633	0.411164	-0.26264	0.210443	0.06959	0.482402	0.548739	-0.00819	-0.01773	0.533137	0.490622	0.096614	-0.09092	0.4826	-0.24439	0.488828	0.33738	0.074835	0.518104	0.534393	0.110494	0.610629	0.020918	-0.16235	-0.23122	-0.13925	0.185266		PAAD	0.00378254	2.4207e-12	0.461566	5.62712e-07	1.89992e-07	0.00121243	0.00999303	0.399045	4.67139e-10	4.3201e-13	0.921002	0.830099	2.56597e-12	2.1281e-10	0.241141	0.270131	4.58505e-10
PCPG	-0.06054	0.03582	0.324778	-0.18235	0.329088	0.016351	-0.07761	0.106255	0.576249	0.24714	-0.0388	-0.12782	0.095282	0.29526	0.010286	0.016071	0.623299	0.009475	0.40447	0.20132	0.34428	0.069106	-0.22975	0.037589	0.079081	0.241389	0.08424	-0.09155	0.180674	0.15775		PCPG	0.427448	0.638893	1.22913e-05	0.0160296	9.25795e-06	0.830435	0.308731	0.162879	8.81687e-17	0.00101026	0.611198	0.0927893	0.211065	7.64621e-05	0.892848	0.833293	4.12092e-20
READ	0.040976	0.113662	0.234371	-0.08447	0.26603	0.014969	-0.07503	0.018163	0.595681	0.586534	-0.09137	0.00829	0.058287	0.347686	0.026179	-0.15383	0.37375	-0.05171	0.472208	0.199599	0.309072	0.357135	0.370205	0.149602	0.470814	-0.10287	0.05828	-0.24528	-0.05927	0.033018		READ	0.61386	0.160448	0.00343759	0.0297624	0.000853749	0.853813	0.355041	0.823087	3.67495e-16	1.3193e-15	0.259732	0.918727	0.472735	9.95462e-06	0.74724	0.0568104	1.80138e-06
SKCM	0.06589	0.18385	0.407356	-0.23773	-0.07	0.09818	-0.17162	0.069162	0.582968	0.506984	-0.07309	-0.00247	0.352207	0.198054	0.05277	-0.17978	0.195623	-0.27885	0.51132	0.178247	0.523043	0.400997	-0.10697	-0.09149	0.639323	0.139335	-0.02059	-0.12768	0.019796	0.299373		SKCM	0.15337	5.97842e-05	2.96863e-20	1.78258e-07	0.129261	0.0331514	0.000182234	0.133924	3.19599e-44	3.98903e-32	0.113155	0.95728	3.34547e-15	1.49236e-05	0.253042	8.7317e-05	1.90607e-05
UCEC	0.024032	0.118965	0.201358	-0.1705	0.041731	0.034296	-0.19227	-0.08928	0.427986	0.588965	-0.0934	-0.03137	0.16906	0.223264	-0.04745	-0.12475	0.467854	-0.10652	0.211622	0.144537	0.219969	0.344315	0.387889	-0.07836	0.488637	0.207332	-0.03462	0.052551	0.174736	0.052711		UCEC	0.591882	0.00774582	5.68472e-06	0.0001276	0.351754	0.44416	1.49763e-05	0.0460145	1.09245e-23	5.18389e-48	0.0368228	0.484027	0.000145746	4.56766e-07	0.289598	0.00521341	1.46435e-28
HLA																																HLA
R value	ARRDC1-AS1	CARD8	GSDMD	ATAT1	CD36	CPTP	DHX33	EIF2AK2	GBP5	NLRC3	PYDC2	SIRT2	TLR4	TLR6	USP50	APP	CASP1	HSP90AB1	MEFV	NFKB1	NFKB2	NLRP3	P2RX7	PANX1	PSTPIP1	PYCARD	RELA	SUGT1	TXN	TXNIP		P value	ARRDC1-AS1	CARD8	GSDMD	ATAT1	CD36	CPTP	DHX33	EIF2AK2	GBP5	NLRC3	PYDC2	SIRT2	TLR4	TLR6	USP50	APP	CASP1
BLCA	0.008034	0.06983	0.329454	-0.36499	-0.11494	-0.19483	-0.18794	0.214266	0.395856	0.494516	-0.10677	0.01531	0.175429	0.387395	-0.03847	0.171102	0.405158	-0.01052	0.198212	0.267329	0.32801	0.468764	0.530194	0.273795	0.498241	0.218611	0.031741	0.000573	0.105892	0.037399		BLCA	0.875631	0.173194	4.02175e-11	1.76049e-13	0.0246653	0.00012704	0.00022061	2.40848e-05	8.80462e-16	5.93846e-25	0.0369829	0.765499	0.000572674	3.97825e-15	0.453417	0.000785077	1.59437e-16
COAD	-0.13699	0.197145	0.260516	-0.27344	0.257921	-0.0641	-0.10057	0.183708	0.566575	0.525643	0.00984	-0.02995	0.118635	0.474354	0.071501	0.014437	0.311646	-0.13198	0.442106	0.270239	0.407772	0.490868	0.54866	0.288418	0.571601	0.135145	0.19639	-0.15971	-0.25769	0.205019		COAD	0.00965985	0.000181519	6.21383e-07	1.59358e-07	8.096e-07	0.227644	0.058007	0.000494551	1.29273e-31	1.1095e-26	0.853214	0.573307	0.0251922	2.24986e-21	0.178283	0.786049	1.85789e-09
ESCA	0.036903	0.391328	0.219857	-0.05745	-0.16301	-0.03254	-0.23174	-0.12573	0.340882	0.549884	0.103557	-0.23103	0.252964	-0.02505	0.081512	-0.0021	0.177366	0.010721	0.039373	0.18323	0.256735	0.244918	0.315302	0.038033	0.509045	-0.02403	0.015409	-0.04785	-0.19107	0.294781		ESCA	0.655005	8.02395e-07	0.00705696	0.486499	0.0470001	0.693579	0.00445844	0.126529	2.09917e-05	3.77675e-13	0.208821	0.00458517	0.00185446	0.761745	0.32303	0.979689	0.0304659
GBM	-0.26022	0.029272	0.351482	-0.28371	0.157082	-0.12311	-0.48127	0.011564	0.357433	-0.00461	-0.12754	-0.13741	0.258879	0.483726	-0.16314	0.037765	0.595946	-0.13501	0.304916	0.187345	0.098301	0.549461	-0.09902	-0.07975	0.449526	0.606471	-0.34557	-0.34844	0.115739	0.089869		GBM	0.00130011	0.722149	1.03229e-05	0.00043439	0.0548963	0.133374	4.54292e-10	0.888302	7.11357e-06	0.955355	0.119879	0.0935731	0.00138003	3.59569e-10	0.0460717	0.646367	8.6221e-16
HNSC	0.066677	0.420793	0.383324	-0.09324	-0.0148	-0.0678	-0.24504	0.177633	0.442754	0.512683	-0.12059	0.048611	0.350653	0.204104	0.06569	0.001709	0.362752	-0.10639	0.077235	0.098154	0.276463	0.208866	0.322665	-0.02185	0.432901	0.211888	-0.03782	-0.06581	-0.05782	0.250327		HNSC	0.148941	1.36036e-21	6.72008e-18	0.0433499	0.749004	0.142219	7.42769e-08	0.000108141	5.52991e-24	7.29514e-33	0.00887361	0.292948	4.81005e-15	8.19157e-06	0.155063	0.970531	4.60022e-16
KIRC	-0.17988	0.281868	0.279526	-0.09323	0.090511	0.049544	-0.17452	0.018193	0.511911	0.546106	-0.18108	0.053864	0.233711	0.307382	0.004986	-0.17738	0.632851	-0.25332	0.179383	0.15699	0.291158	0.282887	0.335578	0.027473	0.548048	0.318413	0.082312	-0.01639	0.103511	0.055322		KIRC	7.52758e-05	3.37141e-10	4.77646e-10	0.0413909	0.047725	0.279187	0.000123511	0.691247	2.37004e-33	1.38114e-38	6.72358e-05	0.239338	2.2979e-07	6.11286e-12	0.913324	9.50273e-05	5.78684e-55
KIRP	-0.16794	0.138323	0.124569	-0.30558	0.245429	-0.00783	-0.40057	-0.24034	0.381348	0.180287	-0.10761	0.170902	0.392039	0.302368	-0.09362	-0.28913	0.492755	-0.13709	0.287365	-0.08086	0.162429	0.519784	0.428866	-0.00087	0.502464	0.302838	-0.09119	-0.23319	0.154155	-0.16554		KIRP	0.0054916	0.0225041	0.0400744	2.74604e-07	4.27977e-05	0.897767	6.62633e-12	6.21773e-05	7.61762e-11	0.00284357	0.0764301	0.00470696	1.99653e-11	3.70943e-07	0.123474	1.23121e-06	4.79971e-18
LIHC	-0.05915	0.036386	0.224834	-0.081	-0.08109	-0.09683	-0.09079	0.084648	0.294404	0.384899	0.014429	-0.02111	0.248983	0.230278	0.035717	0.079252	0.546507	0.066527	0.266539	0.242728	0.250175	0.53285	-0.03365	-0.09554	0.551127	0.33491	0.084752	0.023724	0.044617	-0.03879		LIHC	0.264956	0.493154	1.80097e-05	0.0126615	0.126172	0.0676255	0.0867327	0.110347	1.43448e-08	4.72232e-14	0.78586	0.691053	1.90632e-06	1.10813e-05	0.501137	0.135037	3.44609e-29
LUAD	0.005435	0.213895	0.173042	-0.22001	0.148397	0.023752	-0.3547	-0.13046	0.306302	0.387899	-0.04498	0.172991	0.344649	-0.08723	-0.06748	0.015179	0.571789	-0.2073	0.153241	0.312262	0.117184	0.354774	0.491319	-0.00634	0.473887	0.327378	0.021321	-0.21835	-0.137	0.325972		LUAD	0.906259	2.74495e-06	0.000158088	1.39031e-06	0.00122337	0.606748	1.93382e-15	0.00452708	1.03834e-11	2.13494e-18	0.329464	0.000158816	1.30669e-14	0.0582577	0.143261	0.742218	2.50485e-42
LUSC	-0.08313	0.418344	0.346208	-0.24941	0.10941	-0.04275	-0.33865	-0.00633	0.410165	0.44924	-0.18968	-0.04912	0.44915	0.261457	0.079184	-0.07135	0.331864	-0.14259	0.335556	0.187223	0.266559	0.584755	0.575643	0.014547	0.421166	0.173564	-0.01757	0.006205	-0.19634	0.368817		LUSC	0.0702688	1.50809e-21	8.03429e-15	3.61319e-08	0.0170593	0.35248	3.28285e-14	0.890587	1.06432e-20	5.69547e-25	3.16832e-05	0.285393	5.83439e-25	7.28512e-09	0.0847207	0.120427	1.12603e-13
PAAD	-0.31034	0.404323	0.074831	-0.26882	0.133974	-0.03371	0.015222	0.216573	0.35106	0.388518	-0.03177	0.003474	0.401003	0.395286	0.189029	-0.03591	0.604109	-0.29871	0.466614	0.223308	0.222317	0.551537	0.498976	0.2876	0.462233	0.086066	0.10531	-0.12633	-0.00285	0.181734		PAAD	0.000117252	3.1558e-07	0.364405	0.000916357	0.103326	0.683168	0.853817	0.00798011	1.13512e-05	9.76706e-07	0.700475	0.966456	4.0206e-07	6.06418e-07	0.0209541	0.66371	3.45117e-16
PCPG	-0.0438	-0.02553	0.362305	-0.17878	0.128776	0.049555	-0.15774	0.110612	0.479038	0.092886	-0.00501	-0.06085	0.146983	0.426473	-0.04622	0.069909	0.582438	-0.01789	0.340186	0.191411	0.322875	0.234834	-0.03613	0.05178	0.033968	0.396148	-0.03504	-0.14331	0.215415	-0.0539		PCPG	0.566031	0.738096	8.98664e-07	0.0182582	0.0903628	0.516101	0.0376439	0.146219	2.28414e-11	0.222823	0.947655	0.425125	0.052943	4.41924e-09	0.54475	0.359331	3.4485e-17
READ	-0.04605	0.155439	0.154152	-0.18065	0.286983	-0.04628	-0.29324	-0.02016	0.57373	0.561432	-0.13846	0.099749	0.080527	0.437605	-0.03538	-0.07737	0.218663	-0.11587	0.431602	0.117722	0.378575	0.452211	0.498592	0.217645	0.540875	0.074213	0.221403	-0.31196	-0.11352	0.132903		READ	0.570616	0.0542361	0.0562864	0.0249602	0.000307896	0.568708	0.000223565	0.803992	7.3918e-15	3.61099e-14	0.0868108	0.218381	0.320812	1.38613e-08	0.663081	0.340207	0.00644017
SKCM	0.054039	0.168152	0.365597	-0.19377	-0.08437	0.083927	-0.26927	0.053006	0.493176	0.474639	-0.10653	0.084015	0.355587	0.254107	0.076802	-0.13105	0.216519	-0.27114	0.441505	0.186167	0.479772	0.347749	-0.03067	-0.03929	0.574049	0.155744	0.074325	-0.13795	-0.01818	0.336623		SKCM	0.241792	0.000246613	2.42715e-16	2.29228e-05	0.0673462	0.0687889	2.87724e-09	0.250923	3.07848e-30	7.77649e-28	0.0207565	0.068497	1.74566e-15	2.24258e-08	0.0959487	0.00438792	2.10679e-06
UCEC	0.009026	0.053717	0.247816	-0.18418	-0.01929	0.034319	-0.27534	-0.00481	0.29923	0.454846	-0.08228	-0.00869	0.119329	0.292506	-0.05751	-0.02974	0.536448	-0.10055	0.187797	0.330795	0.264711	0.553802	0.413429	-0.06922	0.368774	0.366992	0.048774	-0.15078	0.135366	0.16374		UCEC	0.840441	0.230523	1.96242e-08	3.41754e-05	0.666908	0.443852	3.77825e-10	0.914596	8.40951e-12	6.70961e-27	0.0659989	0.84634	0.00755928	2.54595e-11	0.199192	0.506953	1.32702e-38
IFN																																IFN
R value	ARRDC1-AS1	CARD8	GSDMD	ATAT1	CD36	CPTP	DHX33	EIF2AK2	GBP5	NLRC3	PYDC2	SIRT2	TLR4	TLR6	USP50	APP	CASP1	HSP90AB1	MEFV	NFKB1	NFKB2	NLRP3	P2RX7	PANX1	PSTPIP1	PYCARD	RELA	SUGT1	TXN	TXNIP		P value	ARRDC1-AS1	CARD8	GSDMD	ATAT1	CD36	CPTP	DHX33	EIF2AK2	GBP5	NLRC3	PYDC2	SIRT2	TLR4	TLR6	USP50	APP	CASP1
BLCA	-0.09331	0.053082	0.248546	-0.41617	-0.13358	-0.28336	-0.11317	0.393935	0.58685	0.506451	-0.04563	-0.04436	0.205653	0.448131	-0.04166	0.185404	0.582177	0.047672	0.267063	0.419944	0.336272	0.455332	0.513372	0.39389	0.469512	0.171082	0.045446	-0.01595	0.182042	0.050597		BLCA	0.0685018	0.300754	8.68636e-07	1.96531e-17	0.00895178	1.7414e-08	0.0269777	1.24482e-15	1.00795e-36	2.80694e-26	0.373841	0.387264	5.12953e-05	2.87253e-20	0.41689	0.000269008	4.91431e-36
COAD	-0.16564	0.260279	0.209218	-0.32997	0.247223	-0.12713	0.040351	0.411621	0.723409	0.598441	-0.04189	-0.08147	0.14552	0.508051	0.092239	0.007561	0.418094	-0.06177	0.500096	0.382922	0.4203	0.491184	0.562378	0.410588	0.564075	-0.05448	0.18514	-0.08275	-0.11247	0.226571		COAD	0.00171222	6.36687e-07	6.95731e-05	1.72825e-10	2.33897e-06	0.0163964	0.44787	5.44843e-16	6.49768e-59	5.8325e-36	0.430708	0.124954	0.00594733	9.27449e-25	0.0822192	0.886952	1.70236e-16
ESCA	-0.02696	0.351531	0.22661	-0.0789	-0.13528	-0.04742	-0.20513	0.079772	0.57264	0.617513	0.145552	-0.11975	0.193972	0.009686	0.171023	-0.0318	0.248402	-0.05682	0.087332	0.226435	0.274309	0.252902	0.313004	0.062045	0.523039	0.005968	0.145354	-0.09459	-0.09417	0.28728		ESCA	0.744157	1.10272e-05	0.00545125	0.338823	0.0999755	0.565794	0.0120879	0.333504	2.34153e-14	4.95369e-17	0.0765333	0.145751	0.0177715	0.906669	0.0370322	0.700251	0.00225346
GBM	-0.33023	0.218953	0.560781	-0.54027	0.09571	0.024268	-0.23945	0.32664	0.668422	0.117995	-0.14115	-0.32849	0.176881	0.412684	-0.13181	0.108075	0.710312	-0.22114	0.36411	0.322189	0.324916	0.458689	-0.29372	-0.09808	0.427033	0.453606	-0.08613	-0.27605	0.04546	0.033704		GBM	3.67429e-05	0.00710399	8.45103e-14	9.6448e-13	0.24399	0.76816	0.0031655	4.51313e-05	9.15132e-21	0.150413	0.084899	4.06134e-05	0.0303633	1.53882e-07	0.107871	0.188031	2.4675e-24
HNSC	-0.06679	0.36173	0.239947	-0.20677	-0.08361	-0.16773	-0.11418	0.457588	0.633444	0.500031	-0.12178	-0.04295	0.343747	0.202145	-0.01449	-0.01919	0.437475	-0.09182	0.203044	0.266124	0.23411	0.219527	0.364851	0.042045	0.220207	0.041179	0.024446	-0.13662	-0.02965	0.292778		HNSC	0.148274	5.63139e-16	1.40044e-07	6.19595e-06	0.0701424	0.00025968	0.0132516	1.06231e-25	4.35271e-54	4.21711e-31	0.00821954	0.352864	1.75676e-14	1.00351e-05	0.754086	0.678095	2.15527e-23
KIRC	-0.22346	0.124438	0.210146	-0.11158	-0.09283	-0.06605	-0.11258	0.081657	0.487696	0.468747	-0.08902	-0.09544	0.262304	0.426375	0.034344	-0.09917	0.670656	-0.13937	0.194015	0.238597	0.23594	0.418637	0.410006	0.086603	0.48182	0.316363	0.046445	-0.0043	0.114051	0.134733		KIRC	7.78828e-07	0.0063922	3.49822e-06	0.0145573	0.042288	0.148926	0.0136912	0.0741852	5.47572e-30	1.54719e-27	0.0515281	0.0367808	5.60382e-09	1.40031e-22	0.453302	0.0300024	7.12461e-64
KIRP	-0.48029	0.387735	-0.19778	-0.35703	0.415968	-0.23526	-0.2192	0.219987	0.673208	0.278607	0.028019	0.210746	0.506775	0.517316	-0.25006	-0.07994	0.470201	0.039099	0.332341	0.120714	0.252863	0.46111	0.481375	0.404034	0.520472	0.16881	0.198718	-0.09728	0.066115	-0.06076		KIRP	4.20653e-17	3.44292e-11	0.00104046	1.34275e-09	8.33014e-13	8.95893e-05	0.000269667	0.000255874	2.8953e-37	3.06429e-06	0.645467	0.000466867	3.75141e-19	5.1001e-20	3.02497e-05	0.18871	2.28546e-16
LIHC	-0.17771	0.166803	-0.03244	-0.16372	-0.03929	-0.03283	0.001028	0.235086	0.405072	0.506237	-0.0893	-0.01053	0.456671	0.377619	-0.02173	0.016218	0.674681	-0.07893	0.361366	0.326007	0.125923	0.519153	0.076852	-0.05564	0.57138	0.121713	0.125648	-0.10349	0.003078	0.134358		LIHC	0.000744049	0.0015627	0.541228	0.00191244	0.459255	0.536431	0.98456	7.14529e-06	1.57379e-15	1.24265e-24	0.0920566	0.842802	8.56463e-20	1.52353e-13	0.682419	0.760082	9.52271e-49
LUAD	-0.04147	0.426995	0.060189	-0.26115	0.011761	-0.1855	-0.09388	0.207138	0.757646	0.650306	0.044828	0.044878	0.536344	0.330263	0.086353	-0.10992	0.544561	-0.17108	0.335054	0.407095	0.293049	0.421146	0.585418	0.187633	0.6302	0.196022	0.060128	0.014705	-0.05172	0.124734		LUAD	0.368712	2.44183e-22	0.191771	8.46969e-09	0.798834	5.02062e-05	0.0414864	5.69055e-06	3.89154e-89	4.42308e-58	0.331145	0.330601	1.63992e-36	1.78825e-13	0.060848	0.0168984	8.46768e-38
LUSC	-0.02576	0.39382	0.390416	-0.24665	-0.00401	-0.1213	-0.25553	0.201169	0.630729	0.481457	-0.11661	-0.1609	0.351602	0.386653	0.065626	-0.12717	0.458758	-0.13411	0.430404	0.308311	0.399315	0.495617	0.560349	-0.0051	0.445473	0.241891	0.017247	-0.045	-0.07975	0.310714		LUSC	0.575446	4.5117e-19	9.59408e-19	5.15834e-08	0.930486	0.00813178	1.61764e-08	9.95885e-06	4.66141e-54	6.21215e-29	0.010977	0.000430834	2.87239e-15	2.18706e-18	0.153272	0.00551066	4.25051e-26
PAAD	-0.38091	0.497986	-0.0069	-0.3406	0.161611	-0.11036	0.209203	0.493853	0.640787	0.405538	-0.03862	-0.04429	0.64079	0.490551	0.060329	0.146697	0.652389	-0.08502	0.613887	0.480344	0.15472	0.485914	0.595705	0.353608	0.419785	0.0826	0.128918	-0.22029	-0.05392	0.354689		PAAD	1.64807e-06	1.03354e-10	0.933438	2.13484e-05	0.048946	0.180271	0.010451	1.55348e-10	1.35341e-18	2.88621e-07	0.64003	0.591715	1.35279e-18	2.14294e-10	0.464855	0.074219	1.99885e-19
PCPG	-0.16087	0.192262	0.314786	-0.20197	0.273485	-0.03377	0.038418	0.354719	0.725679	0.313161	-0.05028	-0.16333	0.386472	0.410947	0.083192	0.117076	0.681756	-0.04119	0.409534	0.410993	0.339551	0.110664	-0.07224	0.272457	-0.01915	0.161257	0.165684	-0.04213	0.112586	0.235657		PCPG	0.0339585	0.0110352	2.33237e-05	0.00752601	0.000260842	0.658247	0.614757	1.56743e-06	9.75972e-30	2.583e-05	0.509936	0.0312892	1.38459e-07	1.776e-08	0.275113	0.123927	3.98221e-25
READ	-0.17815	0.389731	-0.09081	-0.1994	0.342102	-0.30854	0.018304	0.354145	0.801102	0.653776	-0.10313	-0.05795	0.205056	0.53315	0.13058	0.045775	0.288791	0.150453	0.56603	0.335405	0.272456	0.552419	0.58204	0.495322	0.413124	-0.27195	0.111294	-0.09225	0.035464	0.176636		READ	0.027072	5.8526e-07	0.262693	0.0131648	1.40838e-05	9.89829e-05	0.821735	6.60853e-06	1.05154e-35	3.85951e-20	0.203076	0.475328	0.0107381	1.09272e-12	0.106491	0.572947	0.000280899
SKCM	-0.00735	0.303205	0.408337	-0.15018	-0.05929	-0.09807	-0.16678	0.253244	0.668766	0.567106	-0.03171	-0.0551	0.473391	0.346192	0.127996	-0.07032	0.224297	-0.20502	0.509265	0.332518	0.468416	0.444659	0.011298	0.011	0.660169	0.056249	-0.10819	0.004463	-0.04178	0.369909		SKCM	0.873565	1.79615e-11	2.36459e-20	0.00107862	0.198954	0.0333553	0.000277567	2.51083e-08	2.30724e-62	1.96114e-41	0.492412	0.23268	1.11502e-27	1.0447e-14	0.00540392	0.127536	8.75774e-07
UCEC	-0.13036	0.140737	0.115243	-0.28727	-0.0066	-0.07263	-0.15425	0.159256	0.576086	0.585644	-0.01628	-0.0865	0.186593	0.346935	-0.0773	-0.09292	0.604715	-0.12211	0.213354	0.36469	0.149679	0.402079	0.422253	0.113712	0.386641	0.112466	0.036278	-0.01043	0.081381	0.131685		UCEC	0.00349832	0.00160606	0.00990719	5.91001e-11	0.88288	0.104797	0.000537778	0.000350225	1.51542e-45	2.29653e-47	0.716496	0.0532449	2.683e-05	1.37472e-15	0.0842094	0.0378006	3.50676e-51
TILs																																TILs
R value	ARRDC1-AS1	CARD8	GSDMD	ATAT1	CD36	CPTP	DHX33	EIF2AK2	GBP5	NLRC3	PYDC2	SIRT2	TLR4	TLR6	USP50	APP	CASP1	HSP90AB1	MEFV	NFKB1	NFKB2	NLRP3	P2RX7	PANX1	PSTPIP1	PYCARD	RELA	SUGT1	TXN	TXNIP		P value	ARRDC1-AS1	CARD8	GSDMD	ATAT1	CD36	CPTP	DHX33	EIF2AK2	GBP5	NLRC3	PYDC2	SIRT2	TLR4	TLR6	USP50	APP	CASP1
BLCA	-0.05842	0.180835	0.27844	-0.43081	-0.1446	-0.27446	-0.22988	0.178922	0.450937	0.666078	-0.09088	-0.03035	0.247282	0.473284	-0.07305	0.163155	0.413241	-0.01129	0.244394	0.280129	0.395434	0.556697	0.586794	0.254607	0.61833	0.146418	-0.00445	-0.01912	0.088468	0.049803		BLCA	0.254663	0.000382121	3.12917e-08	1.0773e-18	0.00462717	4.98911e-08	5.64706e-06	0.000441519	1.56571e-20	2.52011e-50	0.0760539	0.554265	9.90812e-07	1.01578e-22	0.154189	0.00137501	3.45621e-17
COAD	-0.18864	0.372357	0.235811	-0.28899	0.32738	-0.11066	-0.03021	0.25724	0.628939	0.710162	-0.02201	0.04517	0.17025	0.605757	0.130918	0.050728	0.291065	-0.12761	0.504201	0.37604	0.395444	0.536381	0.60396	0.343141	0.68902	-0.0178	0.244538	-0.18454	-0.29863	0.209075		COAD	0.000344954	3.76437e-13	6.88524e-06	2.81903e-08	2.4425e-10	0.036895	0.569949	8.67384e-07	1.33575e-40	6.66405e-56	0.678905	0.395488	0.00126173	4.99289e-37	0.0134316	0.339888	2.21823e-08
ESCA	-0.01938	0.492409	0.126908	-0.04659	-0.14226	-0.15491	-0.18959	-0.0623	0.373717	0.75798	0.06334	-0.16055	0.317335	0.021222	0.122477	-0.00861	0.154319	-0.1649	0.086729	0.160092	0.202381	0.379072	0.336857	0.00543	0.620719	-0.10096	-0.04654	-0.09915	-0.18095	0.364133		ESCA	0.814569	1.7888e-10	0.122999	0.572588	0.0835019	0.0592494	0.020572	0.450341	2.67106e-06	4.54319e-29	0.442828	0.0504698	8.03452e-05	0.797264	0.136739	0.916996	0.0402287
GBM	-0.37975	0.043592	0.350194	-0.43165	0.15332	-0.2099	-0.46745	-0.00621	0.425171	0.028116	-0.1678	-0.18285	0.33281	0.651874	-0.09496	0.012591	0.598857	-0.14844	0.43763	0.328576	0.273623	0.666203	-0.1384	-0.01713	0.576749	0.751917	-0.34614	-0.31704	0.169756	0.20083		GBM	1.64393e-06	0.596339	1.11783e-05	3.48763e-08	0.0610466	0.00993542	1.63331e-09	0.939871	5.85151e-08	0.732699	0.0401213	0.0251125	3.1653e-05	1.64763e-19	0.247736	0.878461	5.75119e-16
HNSC	-0.03598	0.569639	0.246702	-0.12067	-0.05546	-0.19021	-0.14358	0.250498	0.443204	0.709868	-0.13157	0.066132	0.506679	0.260384	0.051517	-0.06622	0.286844	-0.15477	0.189864	0.213559	0.294864	0.232849	0.343514	-0.06859	0.479874	0.054032	0.012763	-0.12696	-0.10868	0.307125		HNSC	0.436466	8.77333e-42	6.0237e-08	0.00882556	0.230113	3.31419e-05	0.00180516	3.70846e-08	4.91863e-24	2.98634e-73	0.00427278	0.152301	5.10971e-32	1.00981e-08	0.265011	0.151769	2.36275e-10
KIRC	-0.19655	0.404498	0.106965	-0.05578	0.067874	-0.21963	0.075031	0.34811	0.730862	0.702441	-0.05221	-0.16479	0.519399	0.554161	0.036311	-0.06125	0.759073	-0.08489	0.270415	0.386843	0.268889	0.438713	0.487735	0.194444	0.576418	0.226061	0.119292	0.095981	-0.00783	0.128048		KIRC	1.47164e-05	2.78262e-20	0.0191983	0.0223009	0.137987	1.2114e-06	0.100971	4.31008e-15	3.73773e-81	1.87385e-72	0.25406	0.000292315	1.90058e-34	6.56946e-40	0.427837	0.180815	5.7736e-91
KIRP	-0.27822	0.317877	0.039281	-0.34493	0.347936	-0.05963	-0.29631	-0.06733	0.542244	0.335355	-0.06263	0.184558	0.534558	0.440176	-0.23115	-0.257	0.542917	-0.08483	0.373819	-0.0032	0.287714	0.625296	0.556768	0.128651	0.66263	0.326567	0.0795	-0.22808	0.05887	-0.05021		KIRP	3.16746e-06	8.4135e-08	0.518855	5.13387e-09	3.69829e-09	0.327193	6.46989e-07	0.268461	3.42121e-22	1.42464e-08	0.3034	0.00224241	1.67334e-21	2.56375e-14	0.000119605	1.77592e-05	2.97113e-22
LIHC	-0.19326	0.115674	0.138534	-0.18409	-0.08876	-0.17734	0.013468	0.075436	0.290198	0.563563	-0.0412	-0.06748	0.311017	0.231804	-0.01496	-0.00141	0.552795	-0.01783	0.316544	0.234064	0.149215	0.555995	0.026076	-0.1673	0.715882	0.16354	0.030686	0.014613	-0.03624	0.102835		LIHC	0.000239331	0.0288687	0.00876758	0.000472111	0.0940245	0.000763286	0.799819	0.154923	2.34336e-08	2.59735e-31	0.437666	0.20341	1.90784e-09	9.65013e-06	0.778196	0.978824	5.87414e-30
LUAD	-0.02786	0.412965	0.132622	-0.2679	0.030569	-0.13906	-0.21067	-0.04752	0.577615	0.714041	-0.0404	0.123029	0.513109	0.161593	-0.01806	-0.09911	0.554077	-0.26089	0.218916	0.348766	0.250106	0.475552	0.577537	0.047744	0.729699	0.240787	0.006506	-0.16425	-0.15855	0.23181		LUAD	0.545989	7.2828e-21	0.00389669	3.35423e-09	0.507631	0.0024636	3.89685e-06	0.302847	2.36558e-43	8.66083e-75	0.381172	0.00745165	4.66498e-33	0.000424141	0.695507	0.0313268	2.46723e-39
LUSC	-0.07189	0.55184	0.32519	-0.26234	0.111526	-0.08396	-0.30908	0.030392	0.483808	0.607255	-0.16838	-0.07345	0.49782	0.359796	0.075931	-0.1206	0.375141	-0.21411	0.411486	0.253238	0.320748	0.646246	0.626763	0.013946	0.540832	0.165134	-0.01851	-0.06014	-0.17203	0.423237		LUSC	0.117644	3.3086e-39	3.67201e-13	6.45374e-09	0.0150226	0.0674925	5.66788e-12	0.508755	3.0711e-29	3.35457e-49	0.000227447	0.109861	4.11076e-31	5.79613e-16	0.0983496	0.00851356	2.54833e-17
PAAD	-0.34089	0.673294	-0.06948	-0.3879	0.422507	-0.24784	0.18534	0.171898	0.449294	0.688962	-0.09772	0.007873	0.585877	0.658906	0.153598	0.047579	0.524498	-0.23246	0.578481	0.426079	0.107111	0.685301	0.623293	0.222024	0.702817	-0.01777	-0.09123	-0.23763	-0.23391	0.286727		PAAD	2.09857e-05	5.1172e-21	0.3998	1.01994e-06	7.98661e-08	0.0023075	0.0236388	0.0360607	9.05223e-09	2.67909e-22	0.235791	0.924083	4.19893e-15	6.57921e-20	0.0614527	0.564475	6.62166e-12
PCPG	-0.14845	0.058291	0.364422	-0.2164	0.281589	-0.03199	-0.0303	0.179737	0.674837	0.26803	-0.06513	-0.10117	0.224767	0.463195	0.01951	0.085056	0.762395	0.022924	0.464172	0.336019	0.354903	0.155456	-0.08524	0.181422	0.06421	0.346277	0.091396	-0.14373	0.195853	0.060531		PCPG	0.0505971	0.444856	7.67432e-07	0.00413092	0.000167153	0.675227	0.691438	0.0176364	1.79386e-24	0.000349251	0.393169	0.18408	0.00286596	1.22828e-10	0.798316	0.264462	2.44381e-34
READ	-0.16804	0.290375	0.131032	-0.17733	0.410412	-0.18384	-0.08292	0.060698	0.674387	0.748285	-0.1333	0.024056	0.105681	0.50779	0.028267	0.028249	0.201168	-0.03005	0.542184	0.268561	0.331469	0.579281	0.570816	0.306837	0.638353	-0.08822	0.172126	-0.27901	-0.19252	0.166695		READ	0.0372382	0.00025906	0.105273	0.027797	1.24771e-07	0.0224754	0.30661	0.454587	9.04585e-22	6.94542e-29	0.0993315	0.767129	0.192083	1.79542e-11	0.727843	0.728009	0.0123592
SKCM	0.082734	0.295793	0.395256	-0.23631	-0.03488	0.040908	-0.1831	0.10086	0.617155	0.660696	-0.07085	-0.00121	0.441605	0.31208	0.062227	-0.13041	0.208181	-0.27627	0.51243	0.275104	0.583211	0.461617	-0.07935	-0.04676	0.719751	0.112235	0.015351	-0.13359	-0.05416	0.446876		SKCM	0.0728394	5.77247e-11	4.61604e-19	2.12015e-07	0.450173	0.375719	6.41592e-05	0.0286196	8.82005e-51	2.11882e-60	0.124659	0.979031	6.67767e-24	4.24643e-12	0.177595	0.00458514	5.212e-06
UCEC	-0.03706	0.183335	0.199859	-0.23232	0.020912	0.036363	-0.19982	-0.05283	0.443509	0.696397	-0.11285	0.023616	0.175495	0.34983	-0.10523	-0.1378	0.544374	-0.11673	0.224747	0.255007	0.249295	0.531568	0.551684	-0.05294	0.563446	0.28287	-0.0043	-0.00442	0.159351	0.090558		UCEC	0.408313	3.7196e-05	6.6905e-06	1.48856e-07	0.640859	0.417169	6.71525e-06	0.238312	1.64933e-25	9.0352e-74	0.0115616	0.598321	7.9789e-05	7.69907e-16	0.0185915	0.00201211	6.42734e-40
[truncated: 13 more columns]

## Sheet: Table S10
Supplementary Table 10. ROC curves analysis of NLRP3 inflammasome activity, TMB and glycolytic activity with immune score and immune CYT in 15 cancer types.
CYT: immune cytolytic activity; TMB: tumor mutation burden
Immune score
NLRP3 inflammasome					Glycolysis					TMB
Cancer type	AUC-value	P-value	FDR		Cancer type	AUC-value	P-value	FDR		Cancer type	AUC-value	P-value	FDR
BLCA	0.940215	4.25136e-50	1.27541e-49		BLCA	0.408953	0.00208278	0.0104139		BLCA	0.507812	0.791687	0.848236
COAD	0.880789	1.35161e-36	2.02741e-36		COAD	0.507443	0.804924	0.928759		COAD	0.553432	0.0762358	0.228708
ESCA	0.875411	5.70417e-16	5.70417e-16		ESCA	0.521039	0.650054	0.886438		ESCA	0.503452	0.940666	0.940666
GBM	0.898283	6.05536e-17	6.98695e-17		GBM	0.759131	5.27241e-08	3.95431e-07		GBM	0.419375	0.0904261	0.19377
HNSC	0.845681	5.14768e-40	1.28692e-39		HNSC	0.502174	0.933636	0.933636		HNSC	0.408097	0.000431484	0.00647226
KIRC	0.902246	3.03995e-37	5.6999e-37		KIRC	0.420387	0.0116066	0.0248713		KIRC	0.51194	0.70504	0.813507
KIRP	0.944865	2.18028e-37	4.67204e-37		KIRP	0.504621	0.89441	0.958297		KIRP	0.482042	0.60598	0.757476
LIHC	0.892857	4.02703e-37	6.71172e-37		LIHC	0.583831	0.00659881	0.0197964		LIHC	0.448831	0.0973054	0.182448
LUAD	0.933035	6.65141e-62	4.98856e-61		LUAD	0.526332	0.312704	0.521173		LUAD	0.412079	0.000749114	0.00561835
LUSC	0.899948	1.50604e-52	5.64763e-52		LUSC	0.524768	0.344788	0.517182		LUSC	0.440431	0.0230721	0.0865203
PAAD	0.961244	1.80835e-22	2.26043e-22		PAAD	0.643556	0.00240398	0.00901492		PAAD	0.360889	0.00326939	0.0163469
PCPG	0.942268	5.26958e-24	7.18579e-24		PCPG	0.753788	6.69615e-09	1.00442e-07		PCPG	0.423263	0.0795609	0.198902
READ	0.905272	2.09791e-16	2.24776e-16		READ	0.48042	0.698991	0.873739		READ	0.435728	0.192563	0.288845
SKCM	0.941024	7.79952e-61	3.89976e-60		SKCM	0.548764	0.0688549	0.129103		SKCM	0.516039	0.54957	0.749414
UCEC	0.930569	3.20094e-65	4.80142e-64		UCEC	0.568513	0.00665078	0.0166269		UCEC	0.538139	0.130864	0.218107
CYT
NLRP3 inflammasome					Glycolysis					TMB
Cancer type	AUC-value	P-value	FDR		Cancer type	AUC-value	P-value	FDR		Cancer type	AUC-value	P-value	FDR
BLCA	0.920452	7.41628e-46	5.56221e-45		BLCA	0.410652	0.00252184	0.0189138		BLCA	0.558291	0.0487568	0.243784
COAD	0.724386	5.63579e-13	7.68517e-13		COAD	0.517706	0.569447	0.85417		COAD	0.592864	0.592864	0.74108
ESCA	0.809829	2.36917e-11	2.73366e-11		ESCA	0.533531	0.469641	0.880577		ESCA	0.502712	0.953364	0.953364
GBM	0.784879	2.19596e-09	2.35282e-09		GBM	0.725347	2.21887e-06	3.3283e-05		GBM	0.471786	0.55351	0.754787
HNSC	0.804465	2.00565e-31	5.01412e-31		HNSC	0.491878	0.755747	0.872016		HNSC	0.45481	0.0834827	0.31306
KIRC	0.848179	2.50764e-28	5.3735e-28		KIRC	0.448058	0.0996307	0.249077		KIRC	0.52877	0.361738	0.678259
KIRP	0.865259	9.46697e-26	1.57783e-25		KIRP	0.492229	0.823364	0.882176		KIRP	0.447411	0.130914	0.392743
LIHC	0.827987	2.20811e-26	4.14021e-26		LIHC	0.569903	0.0235064	0.0705191		LIHC	0.460032	0.195287	0.488218
LUAD	0.852198	1.49136e-41	7.4568e-41		LUAD	0.49917	0.974626	0.974626		LUAD	0.503493	0.893475	0.957294
LUSC	0.839625	2.20625e-38	6.61876e-38		LUSC	0.487747	0.640237	0.800296		LUSC	0.386701	0.522693	0.78404
PAAD	0.859378	3.00119e-14	4.50179e-14		PAAD	0.608356	0.0219666	0.0823748		PAAD	0.338311	0.000629527	0.00944291
PCPG	0.814655	6.52546e-13	8.15682e-13		PCPG	0.631139	0.0027339	0.0136695		PCPG	0.478514	0.623492	0.719414
READ	0.75641	4.11203e-07	4.11203e-07		READ	0.532867	0.516291	0.860484		READ	0.53986	0.43118	0.718633
SKCM	0.903193	3.84133e-51	5.762e-50		SKCM	0.533465	0.211821	0.453902		SKCM	0.530857	0.249627	0.534915
UCEC	0.832921	1.03963e-39	3.89861e-39		UCEC	0.513883	0.582372	0.794143		UCEC	0.584603	0.000804654	0.00603491

[truncated: 1 more sheets: Table S11]
