# Supplementary material for: Characterization of Lactate Metabolism Score in Breast and Thyroid Cancers to Assist Immunotherapy via Large-Scale Transcriptomic Data Analysis
Source: Front Pharmacol. 2022 Jul 7;13:928419. doi: 10.3389/fphar.2022.928419 (PMC9301074; doi:10.3389/fphar.2022.928419)
Supplement: Supplementary file 2 [file Table1.XLSX]

## Sheet: Table 1
Table 1. Public datasets used in this study.
Tumor types	Datasets	Samples
		Tumor	Normal
BRCA	GSE36295	45	5
	GSE109169	25	25
	GSE58812	107	0
	GSE20685	327	0
	TCGA-BRCA	1072	99
THCA	GSE165724	58	16
	TCGA-THCA	497	56

## Sheet: Table S1
Supplementary Table 1: List of the gene sets.
Immune signatures					LACTATE_Related_genes
HLA	IFN	TILs	CYT		AARS2
HLA-E	JAK2	ITM2C	PRF1		ACAD9
HLA-DPB2	IRF1	CD38	GZMA		ACAT1
HLA-C	IRF2	THEMIS2			ACAT2
HLA-J	GBP4	GLYR1			ADAMTS13
HLA-DQB1	GBP5	ICOS			AGK
HLA-DQB2		F5			AIFM1
HLA-DQA2		TIGIT			ATAD3A
HLA-DQA1		KLRD1			ATPAF2
HLA-A		IRF4			BCS1L
HLA-DMA		PRKCQ			C12orf65
HLA-DOB		FCRL5			C1QBP
HLA-DRB1		SIRPG			CA5A
HLA-B		LPXN			CARS2
HLA-DRB5		IL2RG			CHCHD10
HLA-DOA		CCL5			CLPB
HLA-DPB1		LCK			COQ2
HLA-DRA		TRAF3IP3			COQ4
HLA-DRB6		CD86			COQ8A
HLA-F		MAL			COQ9
HLA-G		LILRB1			COX10
HLA-DMB		DOK2			COX14
HLA-DPA1		CD6			COX15
		PAG1			COX20
		LAX1			COX4I1
		PLEK			COX5A
		PIK3CD			COX6A2
		SLAMF1			COX6B1
		XCL1			COX8A
		GPR171			CYC1
		XCL2			DARS2
		TBX21			DGUOK
		CD2			DLD
		CD53			DNAJC19
		KLHL6			DNM1L
		SLAMF6			EARS2
		CD40			ECHS1
		SIT1			FARS2
		TNFRSF4			FASTKD2
		CD79A			FBXL4
		CD247			FDX2
		LCP2			FOXRED1
		CD3D			GFM1
		CD27			GFM2
		SH2D1A			GOT2
		FYB			GTPBP3
		ARHGAP30			GYS2
		ACAP1			HIBCH
		CST7			HMGCL
		CD3G			HPDL
		IL2RB			HS6ST2
		CD3E			HSD17B10
		FCRL3			HTRA2
		CORO1A			ISCA1
		ITK			ISCU
		TCL1A			LDHA
		CYBB			LIAS
		CSF2RB			LIPT1
		IKZF1			LIPT2
		NCF4			LONP1
		DOCK2			LRPPRC
		CCR2			LYRM7
		PTPRC			MDH2
		PLAC8			MECP2
		NCKAP1L			MICOS13
		IL7R			MIPEP
		2019-09-06			MPC1
		CD28			MRPL12
		STAT4			MRPL3
		CD8A			MRPL44
		LY9			MRPS14
		CD48			MRPS16
		HCST			MRPS22
		PTPRCAP			MRPS28
		SASH3			MRPS34
		ARHGAP25			MT-ATP6
		LAT			MT-CO1
		TRAT1			MT-CO2
		IL10RA			MT-CO3
		PAX5			MT-ND1
		CCR7			MT-ND2
		DOCK11			MT-ND3
		PARVG			MT-ND4
		SPNS1			MT-ND5
		CD52			MT-ND6
		HCLS1			MT-TF
		ARHGAP9			MT-TH
		GIMAP6			MT-TI
		PRKCB			MT-TK
		MS4A1			MT-TL1
		GPR18			MT-TL2
		TBC1D10C			MT-TN
		GVINP1			MT-TP
		P2RY8			MT-TQ
		EVI2B			MT-TS2
		VAMP5			MT-TV
		KLRK1			MT-TW
		SELL			MTFMT
		MPEG1			MTO1
		MS4A6A			NARS2
		ARHGAP15			NAXE
		MFNG			NDUFA1
		GZMK			NDUFA10
		SELPLG			NDUFA11
		TARP			NDUFA12
		GIMAP7			NDUFA13
		FAM65B			NDUFA2
		INPP5D			NDUFA4
		ITGA4			NDUFA9
		MZB1			NDUFAF1
		GPSM3			NDUFAF2
		STK10			NDUFAF3
		CLEC2D			NDUFAF5
		IL16			NDUFAF6
		NLRC3			NDUFB8
		GIMAP5			NDUFB9
		GIMAP4			NDUFS1
		IFFO1			NDUFS2
		CFH			NDUFS3
		PVRIG			NDUFS4
		CFHR1			NDUFS7
					NDUFS8
					NDUFV1
					NDUFV2
					NGLY1
					OCRL
					OGDH
					PC
					PDHA1
					PDHX
					PDP1
					PDSS1
					PDSS2
					PET100
					PET117
					PMPCB
					PNPLA8
					PNPO
					PNPT1
					POLG
					POLG2
					PUS1
					PYGL
					RARS1
					RARS2
					RMND1
					RNASEH1
					RRM2B
					SCO1
					SCO2
					SDHA
					SERAC1
					SFXN4
					SLC19A3
					SLC25A10
					SLC25A26
					SLC25A3
					SLC25A4
					SLC25A42
					SLC7A7
					SOD1
					SURF1
					SYNJ1
					TACO1
					TANGO2
					TARS2
					TIMM22
					TIMM50
					TK2
					TMEM126B
					TMEM70
					TRMT10C
					TRMT5
					TRMU
					TSFM
					TUFM
					TWNK
					TXN2
					UQCC3
					UQCRB
					UQCRC2
					UQCRQ
					WARS2
					YARS2
					ACADM
					B3GALNT2
					B4GAT1
					CALR
					CD46
					CFH
					CFI
					CHEK2
					COL4A1
					CRPPA
					DAG1
					FKRP
					FKTN
					FLI1
					GAA
					GATA1
					HBB
					HELLPAR
					INPP5K
					IRAK1
					JAK2
					KCNN4
					LARGE1
					LYST
					MPL
					MVK
					MYC
					PIEZO1
					PLA2G6
					PLEC
					PNPLA2
					POMGNT1
					POMGNT2
					POMK
					POMT1
					POMT2
					RB1
					RHAG
					RPS14
					RXYLT1
					SIL1
					SLC25A13
					SLC4A1
					SPP1
					STAT4
					TET2
					TP53
					USB1
					VPS13A
					SLC16A1
					SLC16A3
					SLC16A7
					SLC16A8
					SLC5A12
					SLC5A8
					LDHAL6A
					LDHAL6B
					LDHB
					LDHC
					LDHD
					EMB
